# Supplementary material
Source: publisher figshare collection journal article supplement (https://acs.figshare.com/ndownloader/files/15284933)
Supplement: Supplementary file 1 [file 15284933]

## Sheet: COVER LETTER
Sequential use of Geographic Information System and Mathematical Programming for the Optimal planning for Energy Production System from Residual Biomass
Supporting Information
José E. Santibañez-Aguilar,* Diego F. Lozano-García and Francisco J. Lozano, Antonio Flores-Tlacuahuac*
Escuela de Ingeniería y Ciencias, Tecnologico de Monterrey, Campus Monterrey, Ave. Eugenio Garza Sada 2501 Sur, Col. Tecnológico, Monterrey, N.L., 64849, Mexico
Email: santibanez.ezequiel@tec.mx; antonio.flores.t@tec.mx
phone: +52(1) 5543472804
Number of sheets: 17
Number of Tables: 20
*Note: Units are: Metric tonnes, MWh, $US dollar, km
*Note: Reference for biomass suppliers, facilities, consumers, raw materials and products are provided in "reference_name_number" sheet

## Sheet: REFERENCE_NAME_NUMBER
This sheet is an auxiliar sheet to associate the used numbers for residual biomass, harvesting sites, facilities, consumers and processing routes
Table S1: Raw Material Key			Table S3: Processing Facility Key			Table S4: Processing Route and Product Key
Raw Material Number	Raw Material Name		Facility Number	Facility Name		Processing route/Product number	Processing route/Product name
1	Corn Stover		1	Parácuaro		1	AMMONIA
2	Rice Straw		2	Ayotlán		2	FORMALDEHYDE
3	Agave residue		3	La Barca		3	MIX FISHER TROPSCH 1
4	Sorghum straw		4	La Barca		4	MIX FISHER TROPSCH 2
5	Sugar cane bagasse		5	La Barca		5	ELECTRICITY
6	Wheat Straw		6	La Barca		6	MIX FISHER TROPSCH 4
7	Barley Straw		7	Sitio de Xitlapehua		7	UREA
8	Pecan nuit shell		8	Sitio de Xitlapehua		8	METANOL
			9	Parácuaro
Table S2: Biomass Supplier Key			10	Ayotlán
Biomass Supplier Number	Biomass Supplier Name		11	La Barca
1	Tototlßn		12	La Barca
2	Atotonilco el Alto		13	Sitio de Xitlapehua
3	La Barca		14	Sitio de Xitlapehua
4	Ayotlán		15	San Martín Hidalgo
5	Santa Cruz Mixtepec		16	Teuchitlán
6	San Martín Lachilá		17	San Martín Hidalgo
7	La Compañía		18	Cuauhtémoc
8	San Agustín Amatengo		19	Cuauhtémoc
9	Taniche		20	Gómez Farías
10	San Pedro Apóstol		21	El Mante
11	San Martín Tilcajete		22	El Mante
12	San Juan Chilateca		23	El Mante
13	San Dionisio Ocotlán		24	El Mante
14	Santa Catarina Cuixtla		25	El Mante
15	Miahuatlán de Porfirio Díaz		26	El Mante
16	Sitio de Xitlapehua		27	El Mante
17	San Baltazar Chichicápam		28	El Mante
18	San Luis Amatlán		29	El Mante
19	San Francisco Logueche		30	El Mante
20	San Juan del Río		31	Omealca
21	San Bartolo Yautepec		32	Paso del Macho
22	Parácuaro		33	Carrillo Puerto
23	Casimiro Castillo		34	Cosolapa
24	Autlán de Navarro		35	Camarón de Tejeda
25	El Grullo		36	Cosolapa
26	Etzatlán		37	Tierra Blanca
27	El Limón		38	Acatlán de Pérez Figueroa
28	Ameca		39	La Antigua
29	San Juanito de Escobedo		40	San Miguel Soyaltepec
30	Ahualulco de Mercado		41	Tierra Blanca
31	San Martín Hidalgo		42	Tierra Blanca
32	Teuchitlán		43	Tierra Blanca
33	Cocula		44	San Miguel Soyaltepec
34	Villa Corona		45	Tres Valles
35	Tala		46	Tierra Blanca
36	El Arenal		47	Tierra Blanca
37	Acatlán de Juárez		48	Tierra Blanca
38	Cuauhtémoc		49	San Juan Bautista Tuxtepec
39	Tonila		50	San Juan Bautista Tuxtepec
40	Tuxpan		51	San José Chiltepec
41	Zapotiltic		52	Tuxtilla
42	El Naranjo		53	Cosamaloapan de Carpio
43	Tamasopo		54	Ixmatlahuacan
44	Nuevo Morelos		55	Loma Bonita
45	Gómez Farías		56	Amatitlán
46	Antiguo Morelos		57	José Azueta
47	Ciudad Valles		58	Carlos A. Carrillo
48	Xicoténcatl		59	Cárdenas
49	El Mante		60	Cárdenas
49	El Mante		61	Venustiano Carranza
49	El Mante		62	Venustiano Carranza
49	El Mante		63	Nicolás Ruíz
50	El Higo		64	Venustiano Carranza
51	Mariano Escobedo		65	Las Rosas
52	Ixhuatlancillo		66	Huixtla
53	Coxcatlán		67	Las Rosas
54	Atzacan		68	Socoltenango
55	Chocamán		69	Chignautla
56	Ixtaczoquitlán		70	Guasave
57	Tomatlán		71	Guasave
58	Fortín		72	Guasave
59	Coatepec		73	Guasave
60	Jilotepec		74	Sinaloa
61	Córdoba		75	Sinaloa
62	Sochiapa		76	Sinaloa
63	Coetzala		77	Sinaloa
64	Totutla		78	Sinaloa
65	Amatlán de los Reyes		79	Sinaloa
66	Naolinco		80	Sinaloa
67	Cuichapa		81	Sinaloa
68	Tepetlán		82	Sinaloa
69	Atoyac		83	Sinaloa
70	Yanga		84	Sinaloa
71	Tlacotepec de Mejía		85	San Pedro Lagunillas
72	Tezonapa		86	San Pedro Lagunillas
73	Tlaltetela		87	San Pedro Lagunillas
74	Zentla		88	Tenamaxtlán
75	Omealca		89	Tenamaxtlán
76	Paso del Macho		90	Guadalupe Victoria
77	Cuitláhuac		91	Poanas
78	Cosolapa		92	Guadalupe Victoria
79	Puente Nacional		93	Poanas
80	Carrillo Puerto		94	Guadalupe Victoria
81	Camarón de Tejeda		95	Poanas
82	Acatlán de Pérez Figueroa		96	Guadalupe Victoria
83	Actopan		97	San Martín Hidalgo
84	Paso de Ovejas		98	Teuchitlán
85	San Miguel Soyaltepec		99	Poanas
86	Ursulo Galván		100	San Martín Hidalgo
87	Manlio Fabio Altamirano		101	Teocuitatlán de Corona
88	La Antigua		102	Teocuitatlán de Corona
89	Tierra Blanca		103	Ixtlahuacán del Río
90	Tres Valles		104	Cuquío
91	San José Chiltepec		105	Cuquío
92	San Juan Bautista Tuxtepec		106	Zapotlanejo
93	Otatitlán		107	Cuquío
94	Cosamaloapan de Carpio		108	Yahualica de González Gallo
95	Tlacojalpan		109	Cuquío
96	Ixmatlahuacan		110	Acatic
97	Loma Bonita		111	Cojumatlán de Régules
98	Tuxtilla		112	Cuquío
99	Acula		113	Zapotlán del Rey
100	Chacaltianguis		114	Yahualica de González Gallo
101	Carlos A. Carrillo		115	Acatic
102	Amatitlán		116	Tototlán
103	José Azueta		117	Acatic
103	José Azueta		118	Tototlán
104	Saltabarranca		119	Tototlán
105	Lerdo de Tejada		120	Valle de Guadalupe
106	Angel R. Cabada		121	Valle de Guadalupe
107	Hueyapan de Ocampo		122	Venustiano Carranza
108	Cárdenas		123	Tepatitlán de Morelos
109	Venustiano Carranza		124	Jamay
110	Huixtla		125	Parácuaro
111	Las Rosas		126	Villamar
112	Socoltenango		127	Tepatitlán de Morelos
113	Tzimol		128	Jamay
114	Zumpango		129	Villa Hidalgo
115	Hueypoxtla		130	Briseñas
116	Tecámac		131	La Barca
117	Tizayuca		132	Tepatitlán de Morelos
118	Tolcayuca		133	La Barca
119	Temascalapa		134	Briseñas
120	Actopan		135	Tangamandapio
121	Zapotlán de Juárez		136	Villa Hidalgo
122	Villa de Tezontepec		137	Jalostotitlán
123	Pachuca de Soto		138	Jalostotitlán
124	Mineral de la Reforma		139	Tepatitlán de Morelos
125	Axapusco		140	La Barca
126	Zempoala		141	Villa Hidalgo
127	Epazoyucan		142	Atotonilco el Alto
128	Emiliano Zapata		143	Ayotlán
129	Tlanalapa		144	Jalostotitlán
130	Calpulalpan		145	Arandas
131	Nanacamilpa de Mariano Arista		146	Chavinda
132	Singuilucan		147	La Barca
133	Tepeapulco		148	Jalostotitlán
134	San Matías Tlalancaleca		149	Jalostotitlán
135	Apan		150	Tanhuato
136	Españita		151	Jalostotitlán
137	Metepec		152	Jalostotitlán
138	Hueyotlipan		153	Arandas
139	Almoloya		154	San Juan de los Lagos
140	Cuautepec de Hinojosa		155	Arandas
141	San Lucas Tecopilco		156	Ecuandureo
142	Xaltocan		157	San Juan de los Lagos
143	Muñoz de Domingo Arenas		158	Ecuandureo
144	Atlangatepec		159	Jesús María
145	Tlaxco		160	San Juan de los Lagos
146	Yauhquemehcan		161	Ecuandureo
147	Ahuazotepec		162	Ayotlán
148	Chignahuapan		163	Arandas
149	Apizaco		164	San Juan de los Lagos
150	Xaloztoc		165	San Juan de los Lagos
151	Terrenate		166	Encarnación de Díaz
152	Rafael Lara Grajales		167	San Juan de los Lagos
153	Ocotepec		168	Jesús María
154	Libres		169	San Juan de los Lagos
155	Cuyoaco		170	Arandas
156	Chignautla		171	Encarnación de Díaz
157	Xoxocotla		172	San Juan de los Lagos
158	Ahome		173	Tlazazalca
159	Guasave		174	Encarnación de Díaz
160	Angostura		175	Tepezalá
161	Sinaloa		176	Tlazazalca
162	Mocorito		177	Encarnación de Díaz
163	Mascota		178	San Diego de Alejandría
164	San Pedro Lagunillas		179	San Diego de Alejandría
165	Cuautla		180	Lagos de Moreno
166	Amatlán de Cañas		181	Unión de San Antonio
167	Ayutla		182	Unión de San Antonio
168	San Juan del Río		183	Tlazazalca
169	Atengo		184	Loreto
170	Unión de Tula		185	Asientos
171	San Marcos		186	Lagos de Moreno
172	Tenamaxtlán		187	Encarnación de Díaz
173	Etzatlán		188	Purísima del Rincón
174	Ejutla		189	Purépero
175	El Limón		190	Unión de San Antonio
176	Ameca		191	Lagos de Moreno
177	Magdalena		192	San Diego de Alejandría
178	San Juanito de Escobedo		193	Lagos de Moreno
179	Guadalupe Victoria		194	Unión de San Antonio
180	Poanas		195	León
181	Ahualulco de Mercado		196	Lagos de Moreno
182	Chiquilistlán		197	Lagos de Moreno
183	San Martín Hidalgo		198	Lagos de Moreno
183	San Martín Hidalgo		199	Lagos de Moreno
184	Cocula		200	Jiménez
185	Teuchitlán		201	Angamacutiro
186	San Gabriel		202	Puruándiro
187	Comala		203	Tarimoro
188	Zapotitlán de Vadillo		204	Corregidora
189	Villa Corona		205	Tlapehuala
190	Tala		206	Colón
191	El Arenal		207	Ezequiel Montes
192	Acatlán de Juárez		208	Acapulco de Juárez
193	Amacueca		209	Acapulco de Juárez
194	Sayula		210	San Marcos
195	Techaluta de Montenegro		211	San Marcos
196	Zapotlán el Grande		212	Florencio Villarreal
197	Atoyac		213	Florencio Villarreal
198	Zapopan		214	Cuautepec
199	Tuxpan		215	Gustavo Díaz Ordaz
200	Gómez Farías		216	Copala
201	Tlajomulco de Zúñiga		217	Gustavo Díaz Ordaz
202	Teocuitatlán de Corona		218	Marquelia
203	Zapotiltic		219	Marquelia
204	Jocotepec		220	Huasca de Ocampo
205	Tlaquepaque		221	Acatlán
206	Ixtlahuacán de los Membrillos		222	Río Bravo
207	Ixtlahuacán del Río		223	Ometepec
208	Tuxcueca		224	Río Bravo
209	El Salto		225	Río Bravo
210	Tecalitlán		226	Ometepec
211	Tonalá		227	Río Bravo
212	Tamazula de Gordiano		228	Río Bravo
213	Juanacatlán		229	Valle Hermoso
214	Zapotlanejo		230	San Juan Atenco
215	Cuquío		231	San Nicolás Buenos Aires
215	Cuquío		232	Aljojuca
216	Tizapán el Alto		233	San Nicolás Buenos Aires
217	Marcos Castellanos		234	Guadalupe Victoria
218	Yahualica de González Gallo		235	José Azueta
219	Zapotlán del Rey		236	José Azueta
220	Acatic		237	Isla
221	Cojumatlán de Régules		238	Isla
222	Poncitlán		239	Isla
223	Sahuayo		240	Isla
224	Ocotlán		241	Acayucan
225	Jiquilpan		242	Soconusco
226	Cañadas de Obregón		243	Texistepec
227	Tototlán		244	Soconusco
228	Valle de Guadalupe		245	Texistepec
229	Tepatitlán de Morelos		246	Texistepec
229	Tepatitlán de Morelos		247	Suchiapa
230	Venustiano Carranza		248	Acala
231	Jamay		249	Venustiano Carranza
232	Villa Hidalgo		250	Tacotalpa
232	Villa Hidalgo		251	Venustiano Carranza
233	Briseñas		252	Venustiano Carranza
234	Villamar		253	Venustiano Carranza
235	Pajacuarán		254	Nicolás Ruíz
236	Atotonilco el Alto		255	Venustiano Carranza
237	La Barca		256	Socoltenango
237	La Barca		257	Socoltenango
238	Vista Hermosa		258	Las Rosas
239	Jalostotitlán		259	Socoltenango
239	Jalostotitlán		260	Tzimol
240	Tangamandapio		261	Frontera Comalapa
241	Chavinda		262	Frontera Comalapa
242	Jesús María		263	La Trinitaria
243	Ixtlán		264	Frontera Comalapa
244	Pabellón de Arteaga		265	La Trinitaria
245	Tanhuato		266	La Trinitaria
246	Rincón de Romos		267	Hecelchakán
247	San Miguel el Alto		268	Hecelchakán
248	Jacona		269	Hecelchakán
249	Ayotlán		270	Hecelchakán
250	Aguascalientes		271	Saucillo
251	Cosío		272	Saucillo
252	Yurécuaro		273	Saucillo
253	Tangancícuaro		274	Saucillo
254	Ecuandureo		275	Saucillo
255	Arandas		276	Jiménez
255	Arandas		277	López
256	Zamora		278	La Cruz
257	San Juan de los Lagos		279	La Cruz
258	San Francisco de los Romo		280	Eloxochitlán
259	Tepezalá		281	Eloxochitlán
260	Jesús María		282	Escuinapa
261	Degollado		283	Tecuala
262	Encarnación de Díaz		284	Tuxpan
263	Paracho		285	Santiago Ixcuintla
264	La Piedad		286	Santiago Ixcuintla
265	Unión de San Antonio		287	Rosamorada
266	Tlazazalca		288	Teocuitatlán de Corona
267	Asientos		289	Tepalcatepec
268	San Diego de Alejandría		290	Tepalcatepec
269	Zináparo		291	Venustiano Carranza
270	Purísima del Rincón		292	Villamar
271	Purépero		293	Briseñas
272	Lagos de Moreno		294	Briseñas
273	Numarán		295	Apatzingán
274	Loreto		296	Parácuaro
275	Penjamillo		297	Apatzingán
276	Manuel Doblado		298	Ayotlán
277	Zacapu		299	Tanhuato
278	San Francisco del Rincón		300	Ecuandureo
279	Panindícuaro		301	Ecuandureo
280	Pénjamo		302	Ecuandureo
281	Jiménez		303	Ayotlán
282	León		304	Parácuaro
283	Angamacutiro		305	Angamacutiro
284	Cuerámaro		306	Puruándiro
285	Romita		307	Tarimoro
286	José Sixto Verduzco		308	Cuauhtémoc
287	Puruándiro		309	El Mante
288	Abasolo		310	El Mante
289	Huaniqueo		311	El Mante
290	Huanímaro		312	El Mante
291	Huiramba		313	El Mante
292	Lagunillas		314	El Mante
293	Pueblo Nuevo		315	El Mante
294	Irapuato		316	El Mante
295	Acuitzio		317	El Mante
296	Morelia		318	El Mante
297	Valle de Santiago		319	Río Bravo
298	Huandacareo		320	Río Bravo
299	Yuriria		321	Río Bravo
300	Salamanca		322	Río Bravo
301	Tarφmbaro		323	Río Bravo
302	Santa Ana Maya		324	Valle Hermoso
303	Jaral del Progreso		325	Valle Hermoso
304	Álvaro Obregón		326	Valle Hermoso
305	Santiago Maravatío		327	Tototlán
306	Charo		328	Jamay
307	Villagrán		329	Jamay
308	Santa Cruz de Juventino Rosas		330	La Barca
309	Indaparapeo		331	La Barca
310	Cortazar		332	La Barca
311	Salvatierra		333	Ayotlán
312	Queréndaro		334	La Barca
313	Celaya
314	Tarimoro		Table S5: Consumer key
315	Zinapécuaro		Consumers number	Consumers name
316	Acámbaro		1	Acapulco de Juarez
317	Hidalgo		2	Aguascalientes
318	Pungarabato		3	Iztacalco
319	Ajuchitlán del Progreso		4	Azcapotzalco
320	Apaseo el Alto		5	Dlvaro Obregen
321	Apaseo el Grande		6	Cadereyta JimOnez
322	Tarandacuao		7	Campeche
323	Jerécuaro		8	Celaya
324	Tuxpan		9	Chihuahua
325	Irimbo		10	Colima
326	Querétaro		11	Ayala
327	Corregidora		12	Cuernavaca
328	Tlapehuala		13	Culiacan
329	Maravatío		14	Durango
330	Tlalchapa		15	El Salto
331	Luvianos		16	Ensenada
332	Doctor Mora		17	IxtaczoquitlIn
333	Aporo		18	Gumez Palacio
334	San José Iturbide		19	Guadalajara
335	Senguio		20	Salvador Alvarado
336	Ocampo		21	Guaymas
337	Huimilpan		22	Hermosillo
338	Epitacio Huerta		23	Iguala de la Independencia
339	El Marqués		24	Irapuato
340	Amatepec		25	Xalapa
341	Zacazonapan		26	Juirez
342	Tlatlaya		27	La Paz
343	Contepec		28	Lizaro Cnrdenas
344	Tlalpujahua		29	Lean
345	Tejupilco		30	Ciudad Madero
346	Pedro Escobedo		31	Magdalena
347	Arcelia		32	El Mante
348	Amealco de Bonfil		33	Manzanillo
349	Colón		34	Matehuala
350	General Canuto A. Neri		35	Mazatlan
351	El Oro		36	Murida
352	Temascalcingo		37	Mexicali
353	San Juan del Río		38	Minatitl n
354	Tequisquiapan		39	Monclova
355	Teloloapan		40	Morelia
356	Ezequiel Montes		41	Navojoa
357	Acambay		42	Nogales
358	Almoloya de Alquisiras		43	Nuevo Laredo
359	Atlacomulco		44	Oaxáca de Junrez
360	Polotitlán		45	Cajeme
361	Aculco		46	Pachuca de Soto
362	Zacualpan		47	Coatzacoalcos
363	Leonardo Bravo		48	Hidalgo del Parral
364	Timilpan		49	Perote
365	Huichapan		50	Poza Rica de Hidalgo
366	Cocula		51	Progreso
367	Tecozautla		52	Puebla
368	Acapulco de Juárez		53	Querétaro
369	Jilotepec		54	Reynosa
370	Iguala de la Independencia		55	Playas de Rosarito
371	Soyaniquilpan de Juárez		56	Sabinas
372	Juan R. Escudero		57	Salina Cruz
373	Alfajayucan		58	Saltillo
374	Tepetitlán		59	Tlanepantla
375	Tula de Allende		60	San Luis Potosí
376	Tepeji del Río de Ocampo		61	Santa Catarina
377	San Marcos		62	Tapachula
378	Tepotzotlán		63	Tehuac
379	Tezontepec de Aldama		64	Tepic
380	Chilcuautla		65	Tierra Blanca
381	Huehuetoca		66	Toluca
382	Atitalaquia		67	Ahome
383	Cuautitlán Izcalli		68	Tula de Allende
384	Coyotepec		69	Tuxtla Gutiérrez
385	Ixmiquilpan		70	Uruapan
386	Tlahuelilpan		71	Ciudad Valles
387	Mixquiahuala de Juárez		72	Veracruz
388	Progreso de Obregón		73	Victoria
389	Teoloyucan		74	Centro
390	Tetepango		75	Zacatecas
391	Cuautitlán		76	Zamora
392	Tequixquiac
393	Apaxco
394	Tultitlán
395	Melchor Ocampo
396	Tultepec
397	Francisco I. Madero
398	Jaltenco
399	Ajacuba
400	Nextlalpan
401	Zumpango
402	Florencio Villarreal
403	Chilapa de Álvarez
404	San Salvador
405	Tonanitla
406	Hueypoxtla
407	Camargo
408	Tecámac
409	Atenco
410	José Joaquin de Herrera
411	Tezoyuca
412	Actopan
413	Cuautepec
414	El Arenal
415	Chiconcuac
416	Chiautla
417	Chicoloapan
418	Copala
419	Teotihuacán
420	Papalotla
421	Gustavo Díaz Ordaz
422	Texcoco
423	San Luis Acatlán
424	Marquelia
425	Tlahuapan
426	Huasca de Ocampo
427	Nanacamilpa de Mariano Arista
428	Huazalingo
429	San Matías Tlalancaleca
430	Sanctórum de Lázaro Cárdenas
431	Acatlán
432	Huejotzingo
433	Atlixco
434	Nealtican
435	Españita
436	Igualapa
437	San Martín Texmelucan
438	Yahualica
439	Benito Juárez
440	Santiago Tulantepec de Lugo Guerrero
441	Atlapexco
442	San Jerónimo Tecuanipan
443	Ixtacuixtla de Mariano Matamoros
444	Tepetitla de Lardizábal
445	Santa Isabel Cholula
446	Tulancingo de Bravo
447	Metepec
448	Hueyotlipan
449	Juan C. Bonilla
450	Tlaltenango
451	San Martín Totoltepec
452	San Gregorio Atzompa
453	San Pedro Cholula
454	Santa Ana Nopalucan
455	Xochiatipan
456	Natívitas
457	Santa Apolonia Teacalco
458	Ocoyucan
459	San Miguel Xoxtla
460	San Damián Texóloc
461	Huautla
462	Coronango
463	San Andrés Cholula
464	Tetlatlahuca
465	Panotla
466	Ometepec
467	Honey
468	San Jerónimo Zacualpan
469	San Lucas Tecopilco
470	San Lorenzo Axocomanitla
471	Zacatelco
472	San Juan Huactzinco
473	Cuautlancingo
474	Totolac
475	Xaltocan
476	Muñoz de Domingo Arenas
477	Xicohtzinco
478	Tlaxcala
479	Tepeyanco
480	Río Bravo
480	Río Bravo
480	Río Bravo
480	Río Bravo
481	Acaxochitlán
482	Benito Juárez
483	Santa Catarina Ayometla
484	Santa Isabel Xiloxoxtla
485	Santa Cruz Quilehtla
486	Apetatitlán de Antonio Carvajal
487	Papalotla de Xicohténcatl
488	La Magdalena Tlaltelulco
489	Atlangatepec
490	Tenancingo
491	Tlaxco
492	Amaxac de Guerrero
493	Acuamanala de Miguel Hidalgo
494	Mazatecochco de José María Morelos
495	Ahuazotepec
496	San Pablo del Monte
497	Contla de Juan Cuamatzi
498	Santa Cruz Tlaxcala
499	Chiautempan
500	Apizaco
501	Teolocholco
502	Cuaxomulco
503	Xochistlahuaca
504	Tzompantepec
505	San Francisco Tetlanohcan
506	San José Teacalco
507	Amozoc
508	Xaloztoc
509	Tocatlán
510	Lázaro Cárdenas
511	Terrenate
512	Huamantla
513	Acajete
514	Ziltlaltépec de Trinidad Sánchez Santos
515	Ixtenco
516	Atoyatempan
517	Mixtla
518	Tlanepantla
519	Tepeaca
520	Santo Tomás Hueyotlipan
521	Tepeyahualco de Cuauhtémoc
522	Huitziltepec
523	Nopalucan
524	Rafael Lara Grajales
525	Cuapiaxtla de Madero
526	Los Reyes de Juárez
527	Tochtepec
528	Atltzayanca
529	Cuapiaxtla
530	San Salvador Huixcolotla
531	Xochitlán Todos Santos
532	Soltepec
533	Coahuitlán
534	San José Chiapa
535	Zapotitlán de Méndez
536	Tecamachalco
537	Coyutla
538	Mazapiltepec de Juárez
539	Mecatlán
540	Libres
541	El Carmen Tequexquitla
542	Ixtepec
543	Yehualtepec
544	Quecholac
545	Chumatlán
546	Nauzontla
547	San Salvador el Seco
548	Tlacotepec de Benito Juárez
549	Zoquiapan
550	Oriental
551	Zaragoza
552	Coxquihui
553	Jonotla
554	San Juan Atenco
555	Espinal
556	Palmar de Bravo
557	Tepanco de López
558	Aljojuca
559	San Nicolás Buenos Aires
560	Teteles de Avila Castillo
561	Atempan
562	Tenampulco
563	Chalchicomula de Sesma
564	Guadalupe Victoria
565	Esperanza
566	Tlachichuca
567	Jalacingo
568	Aquila
569	Atzitzintla
570	Acultzingo
571	Chilchotla
572	Ayahualulco
573	Mariano Escobedo
574	Xoxocotla
575	Alpatláhuac
576	Coscomatepec
577	Astacinga
578	Chichiquila
579	Chocamán
580	Tehuipango
581	Tomatlán
582	Coetzala
583	Zongolica
584	Miahuatlán
585	Landero y Coss
586	Acatlán
587	Cuichapa
588	San José Tenango
589	San Felipe Jalapa de Díaz
590	Ayotzintepec
591	José Azueta
592	Isla
592	Isla
593	Santiago Tuxtla
594	San Andrés Tuxtla
595	Hueyapan de Ocampo
596	Acayucan
597	Soteapan
598	Soconusco
599	Mecayapan
600	Tatahuicapan de Juárez
601	Texistepec
602	Jáltipan
603	Oteapan
604	Zaragoza
605	Villaflores
606	Coapilla
607	Tuxtla Gutiérrez
608	Suchiapa
609	Soyaló
610	Bochil
611	Chiapa de Corzo
612	Pueblo Nuevo Solistahuacán
613	Ixtapa
614	San Andrés Duraznal
615	Acala
616	Larráinzar
617	Tacotalpa
618	Zinacantán
619	El Bosque
620	Santiago el Pinar
621	La Concordia
622	San Lucas
623	Chiapilla
624	Aldama
625	Chamula
626	Simojovel
627	Sabanilla
628	Totolapa
629	Chalchihuitán
630	Nicolás Ruíz
631	Venustiano Carranza
632	Mitontic
633	Teopisca
634	Tenejapa
635	San Juan Cancuc
636	Amatenango del Valle
637	Las Rosas
638	Motozintla
639	El Porvenir
640	Bella Vista
641	La Grandeza
642	Bejucal de Ocampo
643	Tuxtla Chico
644	Frontera Comalapa
645	Amatenango de la Frontera
646	La Trinitaria
647	La Independencia
648	Hecelchakán
649	Rosales
650	Delicias
651	Meoqui
652	Allende
653	Jiménez
654	Saucillo
655	La Cruz
656	López
657	San Francisco de Conchos
658	Peñamiller
659	Atotonilco el Grande
660	San Agustín Metzquititlán
661	Tasquillo
662	Eloxochitlán
663	Metztitlán
664	Escuinapa
665	Tecuala
666	Tuxpan
667	Santiago Ixcuintla
668	Acaponeta
669	Rosamorada
670	San Martín Hidalgo
671	San Gabriel
672	Coahuayana
673	Amacueca
674	Techaluta de Montenegro
675	Zacoalco de Torres
676	Zapotlán el Grande
677	Teocuitatlán de Corona
678	Tepalcatepec
678	Tepalcatepec
679	Jilotlán de los Dolores
680	Sahuayo
681	Jiquilpan
682	Tototlán
682	Tototlán
683	Venustiano Carranza
684	Briseñas
685	Villamar
686	Pajacuarán
687	Vista Hermosa
688	Chavinda
689	Apatzingán
690	Ixtlán
691	Ayotlán
692	Tanhuato
692	Tanhuato
693	Zamora
694	Ecuandureo
695	Yurécuaro
696	Parácuaro
697	Degollado
698	Múgica
699	Churintzio
700	La Piedad
701	Zináparo
702	Numarán
703	Purísima del Rincón
704	Manuel Doblado
705	San Francisco del Rincón
706	Penjamillo
707	Panindícuaro
708	Pénjamo
709	Jiménez
710	Cuerámaro
711	León
712	Romita
713	José Sixto Verduzco
714	Abasolo
715	Puruándiro
716	Huanímaro
717	Silao
718	Irapuato
719	Pueblo Nuevo
720	Yuriria
721	Valle de Santiago
722	Salamanca
723	Jaral del Progreso
724	Santa Ana Maya
725	Álvaro Obregón
726	Santa Cruz de Juventino Rosas
727	Villagrßn
728	Santiago Maravatío
729	Cortazar
730	Indaparapeo
731	Salvatierra
732	Celaya
733	Tarimoro
733	Tarimoro
734	Acámbaro
735	Apaseo el Alto
736	Tarandacuao
737	Jerécuaro
738	Pedro Escobedo
739	El Mante
740	Tamuín
741	González
742	Méndez
743	Ebano
744	Reynosa
745	Río Bravo
746	San Fernando
747	Valle Hermoso
748	Matamoros
749	Ixtlahuacán de los Membrillos
750	Zapotlán del Rey
751	Ocotlán
752	Jamay
753	Briseñas
754	La Barca
755	Vista Hermosa
756	Ixtlán
757	Ayotlán
758	Yurécuaro
759	Penjamillo
760	Pénjamo
761	Cuerámaro
762	José Sixto Verduzco
763	Abasolo
764	Huanímaro

## Sheet: M_AVAILABLE
M_AVAILABLE(B,S) AVAILABLE AGRICULTURAL RESIDUE
B	RESIDUAL BIOMASS
S	HARVESTING SITES
	Table S6: Available Agricultural Residue (Mg/y)
	RAW MATERIAL TYPE	Columna1	SUPPLIER_GRAL	AVERAGE
	3	.	1	26724.8
	3	.	2	126412
	3	.	3	29429.8
	3	.	4	58157.5
	3	.	5	1533.33
	3	.	6	0
	3	.	7	5253.83
	3	.	8	1587.33
	3	.	9	1033.83
	3	.	10	1237
	3	.	11	915.333
	3	.	12	352.167
	3	.	13	364.5
	3	.	14	5659
	3	.	15	13851.3
	3	.	16	783.333
	3	.	17	4227.83
	3	.	18	10540.5
	3	.	19	10767.8
	3	.	20	4573
	3	.	21	2780.33
	2	.	22	0
	5	.	24	395471
	5	.	25	342875
	5	.	26	129712
	5	.	27	208947
	5	.	28	547576
	5	.	29	171411
	5	.	30	457366
	5	.	31	274115
	5	.	32	138074
	5	.	33	248844
	5	.	34	222145
	5	.	35	671405
	5	.	36	137601
	5	.	37	89311.2
	5	.	23	311099
	5	.	38	564555
	5	.	39	99239.8
	5	.	40	340562
	5	.	41	559549
	5	.	42	627134
	5	.	43	571974
	5	.	44	175479
	5	.	45	528524
	5	.	46	274877
	5	.	47	1.8075e+06
	5	.	48	790213
	5	.	49	1.06273e+06
	5	.	50	655096
	5	.	51	377815
	5	.	52	21875
	5	.	53	153431
	5	.	54	250969
	5	.	55	214156
	5	.	56	551867
	5	.	57	121177
	5	.	58	108875
	5	.	59	224845
	5	.	61	442442
	5	.	62	26092.5
	5	.	63	8138
	5	.	64	147454
	5	.	65	186572
	5	.	67	232472
	5	.	69	189049
	5	.	70	355287
	5	.	71	90569.2
	5	.	72	602115
	5	.	73	162994
	5	.	74	311172
	5	.	75	839817
	5	.	76	606521
	5	.	77	191017
	5	.	78	531829
	5	.	79	350462
	5	.	80	196823
	5	.	81	165092
	5	.	82	1.0671e+06
	5	.	83	625233
	5	.	84	351296
	5	.	85	711330
	5	.	86	633502
	5	.	87	157266
	5	.	88	228290
	5	.	89	966917
	5	.	90	1.16936e+06
	5	.	92	1.11841e+06
	5	.	93	165631
	5	.	94	969292
	5	.	95	176154
	5	.	96	179909
	5	.	99	83653.2
	5	.	60	33394
	5	.	66	63339.3
	5	.	68	37027
	5	.	91	153740
	5	.	98	45537.3
	5	.	100	295816
	5	.	101	243972
	5	.	102	232599
	5	.	97	196387
	5	.	103	363392
	5	.	104	122076
	5	.	105	175118
	5	.	106	560867
	5	.	107	528737
	5	.	108	1.09432e+06
	5	.	109	866116
	5	.	111	162556
	5	.	112	409360
	5	.	113	184363
	5	.	110	634891
	7	.	114	3112.83
	7	.	115	4358.33
	7	.	116	2550.17
	7	.	117	3958.67
	7	.	118	3714
	7	.	119	10736.3
	7	.	120	6672.17
	7	.	121	5482.33
	7	.	122	2916.83
	7	.	123	2916
	7	.	124	3384.33
	7	.	125	8881.67
	7	.	126	15073.8
	7	.	127	8705.33
	7	.	128	2799.33
	7	.	129	3957.33
	7	.	130	15240.5
	7	.	131	7983
	7	.	132	25665.3
	7	.	133	13022.2
	7	.	134	2254.33
	7	.	135	31807.2
	7	.	136	5661.17
	7	.	137	2359.67
	7	.	138	7207.17
	7	.	139	18268
	7	.	140	17692.2
	7	.	141	1674.5
	7	.	142	2541.5
	7	.	143	3539
	7	.	144	3883.17
	7	.	145	26102.3
	7	.	146	1601.33
	7	.	147	1736
	7	.	148	11115.7
	7	.	149	4436.67
	7	.	150	791.667
	7	.	151	2473.17
	7	.	152	149.667
	7	.	153	2223.5
	7	.	154	4217.5
	7	.	155	14625.3
	7	.	156	1004.17
	7	.	157	829.167
	1	.	158	826486
	1	.	159	911151
	1	.	160	239821
	1	.	161	252202
	1	.	162	114610
	1	.	163	50754
	1	.	164	24393.8
	1	.	166	25999.5
	1	.	169	35741.2
	1	.	171	18666.2
	1	.	173	41394
	1	.	176	80807.7
	1	.	177	18817.3
	1	.	178	23328.2
	1	.	181	39073.5
	1	.	165	12028.7
	1	.	167	47112.8
	1	.	170	51849
	1	.	172	33779.7
	1	.	174	11697.2
	1	.	175	3701.67
	1	.	182	8721.67
	1	.	183	100885
	1	.	184	34151.8
	1	.	185	12880.3
	1	.	186	41376.3
	1	.	187	8707
	1	.	188	10914.5
	1	.	189	12185.5
	1	.	190	35724.7
	1	.	191	8902.67
	1	.	192	11263.5
	1	.	193	3715.5
	1	.	194	20386.8
	1	.	195	2609.83
	1	.	196	69975.8
	1	.	197	17527
	1	.	200	19468.8
	1	.	201	86977.3
	1	.	202	32307.5
	1	.	204	44541.2
	1	.	203	33482.5
	1	.	205	33597.2
	1	.	206	40572.3
	1	.	208	6453.33
	1	.	168	96737.2
	1	.	179	127008
	1	.	180	124495
	1	.	198	96566.5
	1	.	207	70248.2
	1	.	209	7954.83
	1	.	211	8264
	1	.	213	13920.7
	1	.	214	82920.5
	1	.	215	79122.2
	1	.	216	10247.7
	1	.	217	6328.17
	1	.	219	97216.2
	1	.	220	27492.7
	1	.	199	61462
	1	.	210	39695.3
	1	.	212	48340.7
	1	.	221	7719.17
	1	.	222	66090
	1	.	223	13443.5
	1	.	224	90281.5
	1	.	225	13088.3
	1	.	227	81853.2
	1	.	230	21509.3
	1	.	231	85212
	1	.	233	17973
	1	.	234	21105
	1	.	235	36606.8
	1	.	229	130597
	1	.	237	230824
	1	.	238	92320.7
	1	.	218	56189.3
	1	.	226	31027.2
	1	.	228	11990.8
	1	.	236	119081
	1	.	239	49699.2
	1	.	247	52041.2
	1	.	232	28924
	1	.	255	70744.2
	1	.	249	98745.2
	1	.	245	30842.8
	1	.	252	17906
	1	.	260	70918.5
	1	.	257	158667
	1	.	265	36901.5
	1	.	261	50466.5
	1	.	241	17278
	1	.	243	17913.8
	1	.	254	17147.8
	1	.	240	15799.7
	1	.	248	5960.5
	1	.	253	15831.3
	1	.	256	37359
	1	.	264	13244.5
	1	.	266	5689.5
	1	.	269	4764.17
	1	.	268	30369.7
	1	.	270	42156.8
	1	.	273	10666.3
	1	.	276	39191
	1	.	262	152606
	1	.	278	32832.2
	1	.	263	8158.67
	1	.	271	5875
	1	.	275	28788.5
	1	.	277	36835.5
	1	.	279	10149.8
	1	.	280	117291
	1	.	281	22477.3
	1	.	283	22478.7
	1	.	242	95233.5
	1	.	244	131121
	1	.	246	222113
	1	.	250	216651
	1	.	251	29549.7
	1	.	258	54566.2
	1	.	259	89003.8
	1	.	267	54943.2
	1	.	272	521989
	1	.	282	45648.3
	1	.	284	22580.5
	1	.	274	31546.5
	1	.	285	30434.2
	1	.	286	41472.3
	1	.	288	62330.8
	1	.	287	51699.5
	1	.	289	12677.5
	1	.	290	20455.3
	1	.	293	5579.17
	1	.	294	54722.8
	1	.	291	2960.33
	1	.	292	3297.67
	1	.	295	6337.17
	1	.	296	43781.3
	1	.	297	90474.7
	1	.	298	3897.17
	1	.	299	29724.2
	1	.	300	45530.8
	1	.	301	38441.8
	1	.	302	13321.2
	1	.	304	43952.8
	1	.	303	38250.3
	1	.	305	8044.67
	1	.	306	20488.2
	1	.	309	41420.5
	1	.	311	85537.8
	1	.	312	22669
	1	.	307	27326.8
	1	.	310	43381
	1	.	314	21702.5
	1	.	308	19021.3
	1	.	313	25842.5
	1	.	315	27086
	1	.	316	72366
	1	.	317	26711.7
	1	.	320	18694.5
	1	.	321	47675.2
	1	.	322	17004
	1	.	323	38108.8
	1	.	324	13192.3
	1	.	325	11079.8
	1	.	326	35217
	1	.	327	11480.3
	1	.	329	63815.3
	1	.	332	57099.8
	1	.	333	5343.83
	1	.	334	56522.7
	1	.	335	16732.5
	1	.	336	6126
	1	.	337	25371.7
	1	.	338	31391.8
	1	.	339	277854
	1	.	343	38214
	1	.	344	5551.17
	1	.	346	170952
	1	.	348	35501.7
	1	.	349	82087.8
	1	.	351	13779.2
	1	.	352	43242.5
	1	.	353	137499
	1	.	354	45256.7
	1	.	356	20334.7
	1	.	357	48016.5
	1	.	360	116529
	1	.	361	86171.7
	1	.	359	58475.2
	1	.	364	10673.3
	1	.	365	19091.5
	1	.	367	17299.2
	1	.	318	3487
	1	.	319	61152.5
	1	.	328	26189
	1	.	330	21995.3
	1	.	331	32423.8
	1	.	340	26948.8
	1	.	341	3558.33
	1	.	342	35126.8
	1	.	345	24500.2
	1	.	347	33511
	1	.	350	7605.83
	1	.	355	29907.2
	1	.	358	7626.67
	1	.	362	11910.8
	1	.	363	21027
	1	.	366	15299.3
	1	.	370	20738.3
	1	.	369	65373
	1	.	371	21062
	1	.	373	20953.8
	1	.	374	6644.33
	1	.	380	17257.5
	1	.	385	30674
	1	.	375	26544.2
	1	.	379	26101
	1	.	386	5843.5
	1	.	387	35666.8
	1	.	388	11311
	1	.	368	55004.8
	1	.	372	14322.8
	1	.	377	48863.8
	1	.	402	9567.5
	1	.	403	20684.7
	1	.	410	7040.67
	1	.	413	16898.2
	1	.	418	7656.33
	1	.	423	43528.7
	1	.	424	7883
	1	.	436	11368.8
	1	.	466	32159.3
	1	.	503	16433.7
	1	.	407	46111
	1	.	421	61158.3
	1	.	480	107916
	1	.	376	16394.2
	1	.	378	25547
	1	.	381	35436.2
	1	.	382	7566.67
	1	.	383	28824.2
	1	.	384	1870.83
	1	.	389	12719.3
	1	.	390	5681.5
	1	.	391	13821
	1	.	392	27768.5
	1	.	393	18173.8
	1	.	394	3637.83
	1	.	395	3538
	1	.	396	10309
	1	.	397	20963.7
	1	.	398	7705.17
	1	.	399	19391.2
	1	.	400	65562.8
	1	.	401	119714
	1	.	404	22238.5
	1	.	405	30150
	1	.	406	31756
	1	.	408	76488.7
	1	.	409	18926.5
	1	.	411	1616
	1	.	412	8995.33
	1	.	414	5787.33
	1	.	415	1058.67
	1	.	416	6248.33
	1	.	417	4017.83
	1	.	419	5915
	1	.	420	969.667
	1	.	422	61764.2
	1	.	425	20360.8
	1	.	426	9757
	1	.	427	6139.67
	1	.	428	3172
	1	.	429	7151.83
	1	.	430	4474.33
	1	.	431	24506.8
	1	.	435	5180.33
	1	.	437	9457.17
	1	.	438	7414.5
	1	.	439	3991.83
	1	.	440	8314
	1	.	441	5890.33
	1	.	443	7854.33
	1	.	444	3704.5
	1	.	446	22395
	1	.	447	21872.2
	1	.	448	7914
	1	.	454	659.833
	1	.	455	7454.83
	1	.	460	2090.83
	1	.	461	11932.8
	1	.	465	4205
	1	.	467	5332.5
	1	.	469	3469
	1	.	474	346.333
	1	.	475	8409.17
	1	.	476	4431.33
	1	.	478	4889.5
	1	.	481	11492.3
	1	.	482	7960.5
	1	.	486	1715.67
	1	.	489	8954.33
	1	.	491	22393.5
	1	.	492	1358.5
	1	.	495	3587.67
	1	.	497	3334.67
	1	.	498	3688.83
	1	.	500	5118.5
	1	.	502	2371.17
	1	.	504	7391
	1	.	508	24033.3
	1	.	509	5129.33
	1	.	510	3084.67
	1	.	511	92220
	1	.	533	3556.5
	1	.	535	1262.5
	1	.	537	9500.83
	1	.	539	2297.67
	1	.	542	1208.83
	1	.	545	2257.33
	1	.	546	1124.17
	1	.	549	1123.17
	1	.	552	4545.83
	1	.	553	1702.67
	1	.	555	10459.2
	1	.	432	18595
	1	.	433	11975.2
	1	.	434	4723
	1	.	442	2352.17
	1	.	445	3128.67
	1	.	449	4596.17
	1	.	450	4806.33
	1	.	451	644.333
	1	.	452	7974
	1	.	453	10596.3
	1	.	456	8698
	1	.	457	1413
	1	.	458	5977.17
	1	.	459	805
	1	.	462	4927.83
	1	.	463	2878.5
	1	.	464	6338.33
	1	.	468	516.833
	1	.	470	1526.67
	1	.	471	4005.33
	1	.	472	472.333
	1	.	473	5709.33
	1	.	477	1563.33
	1	.	479	1367.83
	1	.	483	1209.33
	1	.	484	298.667
	1	.	485	455
	1	.	487	5322.83
	1	.	488	1230.83
	1	.	490	1512
	1	.	493	1579.33
	1	.	494	1093.5
	1	.	496	4733.83
	1	.	499	6879
	1	.	501	6500.5
	1	.	505	1743.83
	1	.	506	3587
	1	.	507	13937
	1	.	512	106001
	1	.	513	24056.2
	1	.	514	9548.33
	1	.	515	7206.83
	1	.	516	10748.5
	1	.	517	734.833
	1	.	518	4365.33
	1	.	519	17564.8
	1	.	520	2376.33
	1	.	521	4746
	1	.	522	4137
	1	.	523	15289.7
	1	.	524	2241.5
	1	.	525	858.667
	1	.	526	2138.67
	1	.	527	18195.3
	1	.	528	36102
	1	.	529	19049.2
	1	.	530	1130.83
	1	.	531	6158
	1	.	532	13621
	1	.	534	12352.7
	1	.	536	52594.5
	1	.	538	5012.67
	1	.	540	35776.3
	1	.	541	5810.17
	1	.	543	5119.5
	1	.	544	8665
	1	.	547	27922.8
	1	.	548	22934
	1	.	550	16161.5
	1	.	551	2709.67
	1	.	554	5729.67
	1	.	556	27288
	1	.	557	18709.5
	1	.	558	11407.3
	1	.	559	15784.7
	1	.	560	546.833
	1	.	561	1575.33
	1	.	563	32066.3
	1	.	564	10891
	1	.	565	7974.33
	1	.	566	27628.8
	1	.	567	7272.67
	1	.	568	1036
	1	.	569	7235.17
	1	.	570	5249.83
	1	.	571	6918
	1	.	572	6306.67
	1	.	573	2109.33
	1	.	574	1714.17
	1	.	575	3030.83
	1	.	576	8096.5
	1	.	577	1353.17
	1	.	578	4825.33
	1	.	579	1412.33
	1	.	580	2153.67
	1	.	581	482.667
	1	.	582	257.833
	1	.	583	9061.67
	1	.	587	947.5
	1	.	584	1161.33
	1	.	585	615.333
	1	.	586	926.667
	1	.	562	5017
	1	.	588	6481.17
	1	.	589	6892.33
	1	.	590	13389
	1	.	591	30911.8
	1	.	592	41157.5
	1	.	593	24173.5
	1	.	594	64169
	1	.	595	36565.2
	1	.	596	21838
	1	.	597	39426.7
	1	.	598	3197.33
	1	.	599	9280.33
	1	.	601	26454.3
	1	.	600	15456.8
	1	.	602	12587
	1	.	603	757.167
	1	.	604	4747.83
	1	.	605	74833
	1	.	606	4374.17
	1	.	607	9734.67
	1	.	608	16172.5
	1	.	609	5412.83
	1	.	610	10061.3
	1	.	611	42231.7
	1	.	612	8675.33
	1	.	613	10967.3
	1	.	614	1738.17
	1	.	615	24099.8
	1	.	616	3554.5
	1	.	618	10581
	1	.	619	7395.17
	1	.	620	643.667
	1	.	621	75123.5
	1	.	622	9786.83
	1	.	623	8088.17
	1	.	624	950.5
	1	.	625	9057.67
	1	.	626	14242.8
	1	.	628	16272.2
	1	.	629	6044
	1	.	630	11490.8
	1	.	631	72265
	1	.	632	1950.33
	1	.	633	6708.5
	1	.	634	8843.17
	1	.	635	6383.5
	1	.	636	4078.83
	1	.	637	6851
	1	.	640	7242
	1	.	644	52280.2
	1	.	617	19136.5
	1	.	627	8765.17
	1	.	639	2843.67
	1	.	641	1826.5
	1	.	642	2198.5
	1	.	645	6807
	1	.	646	52505
	1	.	647	26482
	1	.	638	15000.7
	1	.	643	11634.2
	1	.	648	51799.8
	8	.	649	1932.5
	8	.	650	2186
	8	.	651	1858.33
	8	.	652	2130.83
	8	.	653	2898.33
	8	.	654	2250.67
	8	.	655	1406.83
	8	.	656	915.333
	8	.	657	9427.67
	8	.	658	225.167
	8	.	659	284.5
	8	.	660	107.833
	8	.	661	1050.33
	8	.	662	99.3333
	8	.	663	742.667
	4	.	664	36653.7
	4	.	665	147948
	4	.	666	27745
	4	.	667	41351.5
	4	.	668	51901.7
	4	.	669	54733
	4	.	670	9391.83
	4	.	671	13439.3
	4	.	673	3442.5
	4	.	674	2026.83
	4	.	675	17544
	4	.	676	7106.83
	4	.	677	15299.8
	4	.	680	4469.5
	4	.	681	5521.17
	4	.	682	8024.33
	4	.	683	14144
	4	.	684	13970.5
	4	.	685	10859.3
	4	.	686	19956.3
	4	.	687	12405.2
	4	.	678	46746.8
	4	.	679	134291
	4	.	689	86980
	4	.	696	51626.2
	4	.	698	25958.8
	4	.	672	18333.3
	4	.	688	16188.8
	4	.	690	13955.3
	4	.	691	12093.8
	4	.	692	22469.2
	4	.	693	11977.7
	4	.	694	22581.5
	4	.	695	9601.5
	4	.	697	8765.67
	4	.	699	5341.83
	4	.	700	15502
	4	.	701	7104.33
	4	.	702	11975.8
	4	.	706	38505.8
	4	.	707	11964.8
	4	.	709	9410.5
	4	.	704	45521.8
	4	.	708	210717
	4	.	703	13447.8
	4	.	705	21593.5
	4	.	710	39248.5
	4	.	712	22579.7
	4	.	713	48508.5
	4	.	714	113324
	4	.	716	38616.5
	4	.	715	54399
	4	.	719	17733.3
	4	.	711	24267
	4	.	718	167196
	4	.	720	47985
	4	.	721	114655
	4	.	722	167466
	4	.	723	18062.7
	4	.	724	9399.17
	4	.	725	16085.7
	4	.	726	21609.2
	4	.	727	39185.7
	4	.	728	5115.17
	4	.	729	50511
	4	.	730	9055.33
	4	.	731	42282.7
	4	.	734	90907
	4	.	717	15803.2
	4	.	732	48366.8
	4	.	733	20804.2
	4	.	735	7247.5
	4	.	736	5952.67
	4	.	737	11629.7
	4	.	738	13912.2
	4	.	739	25565
	4	.	740	30457.8
	4	.	741	92252
	4	.	743	59076.5
	4	.	742	134840
	4	.	744	190326
	4	.	745	568445
	4	.	747	231059
	4	.	748	512079
	4	.	746	502785
	6	.	749	8961.83
	6	.	750	9335.83
	6	.	751	7296.67
	6	.	752	15706.5
	6	.	753	3674.33
	6	.	754	32329.2
	6	.	755	10793.3
	6	.	756	5036.5
	6	.	757	12661.3
	6	.	758	5670.67
	6	.	759	8838.83
	6	.	760	89450.5
	6	.	761	17434.3
	6	.	762	25473.7
	6	.	763	44626
	6	.	764	14960.8

## Sheet: TRANSPORT_LIMIT
LIMIT(B,S,F)
		Table S7: Transportation limits for raw material (Mg/y)
		BIOMASS	Columna1	PLANT	Columna2	SUPPLIER	VALUE
		3	.	1	.	1	26724.8
		3	.	1	.	2	126412
		3	.	1	.	3	29429.8
		3	.	1	.	4	58157.5
		3	.	2	.	1	26724.8
		3	.	2	.	2	126412
		3	.	2	.	3	29429.8
		3	.	2	.	4	58157.5
		3	.	3	.	1	26724.8
		3	.	3	.	2	126412
		3	.	3	.	3	29429.8
		3	.	3	.	4	58157.5
		3	.	4	.	1	26724.8
		3	.	4	.	2	126412
		3	.	4	.	3	29429.8
		3	.	4	.	4	58157.5
		3	.	5	.	1	26724.8
		3	.	5	.	2	126412
		3	.	5	.	3	29429.8
		3	.	5	.	4	58157.5
		3	.	6	.	1	26724.8
		3	.	6	.	2	126412
		3	.	6	.	3	29429.8
		3	.	6	.	4	58157.5
		3	.	7	.	5	1533.33
		3	.	7	.	6	0
		3	.	7	.	7	5253.83
		3	.	7	.	8	1587.33
		3	.	7	.	9	1033.83
		3	.	7	.	10	1237
		3	.	7	.	11	915.333
		3	.	7	.	12	352.167
		3	.	7	.	13	364.5
		3	.	7	.	14	5659
		3	.	7	.	15	13851.3
		3	.	7	.	16	783.333
		3	.	7	.	17	4227.83
		3	.	7	.	18	10540.5
		3	.	7	.	19	10767.8
		3	.	7	.	20	4573
		3	.	7	.	21	2780.33
		3	.	8	.	5	1533.33
		3	.	8	.	6	0
		3	.	8	.	7	5253.83
		3	.	8	.	8	1587.33
		3	.	8	.	9	1033.83
		3	.	8	.	10	1237
		3	.	8	.	11	915.333
		3	.	8	.	12	352.167
		3	.	8	.	13	364.5
		3	.	8	.	14	5659
		3	.	8	.	15	13851.3
		3	.	8	.	16	783.333
		3	.	8	.	17	4227.83
		3	.	8	.	18	10540.5
		3	.	8	.	19	10767.8
		3	.	8	.	20	4573
		3	.	8	.	21	2780.33
		2	.	9	.	22	0
		2	.	10	.	22	0
		2	.	11	.	22	0
		2	.	12	.	22	0
		2	.	13	.	22	0
		2	.	14	.	22	0
		2	.	15	.	22	0
		2	.	16	.	22	0
		5	.	15	.	24	395471
		5	.	15	.	25	342875
		5	.	15	.	26	129712
		5	.	15	.	27	208947
		5	.	15	.	28	547576
		5	.	15	.	29	171411
		5	.	15	.	30	457366
		5	.	15	.	31	274115
		5	.	15	.	32	138074
		5	.	15	.	33	248844
		5	.	15	.	34	222145
		5	.	15	.	35	671405
		5	.	15	.	36	137601
		5	.	15	.	37	89311.2
		5	.	16	.	25	342875
		5	.	16	.	26	129712
		5	.	16	.	27	208947
		5	.	16	.	28	547576
		5	.	16	.	29	171411
		5	.	16	.	30	457366
		5	.	16	.	31	274115
		5	.	16	.	32	138074
		5	.	16	.	33	248844
		5	.	16	.	34	222145
		5	.	16	.	35	671405
		5	.	16	.	36	137601
		5	.	16	.	37	89311.2
		5	.	17	.	24	395471
		5	.	17	.	25	342875
		5	.	17	.	26	129712
		5	.	17	.	27	208947
		5	.	17	.	28	547576
		5	.	17	.	29	171411
		5	.	17	.	30	457366
		5	.	17	.	31	274115
		5	.	17	.	32	138074
		5	.	17	.	33	248844
		5	.	17	.	34	222145
		5	.	17	.	35	671405
		5	.	17	.	36	137601
		5	.	17	.	37	89311.2
		5	.	18	.	23	311099
		5	.	18	.	24	395471
		5	.	18	.	25	342875
		5	.	18	.	27	208947
		5	.	18	.	38	564555
		5	.	18	.	39	99239.8
		5	.	18	.	40	340562
		5	.	18	.	41	559549
		5	.	19	.	42	627134
		5	.	19	.	43	571974
		5	.	19	.	44	175479
		5	.	19	.	45	528524
		5	.	19	.	46	274877
		5	.	19	.	47	1.8075e+06
		5	.	19	.	48	790213
		5	.	19	.	49	1.06273e+06
		5	.	20	.	42	627134
		5	.	20	.	43	571974
		5	.	20	.	44	175479
		5	.	20	.	45	528524
		5	.	20	.	46	274877
		5	.	20	.	47	1.8075e+06
		5	.	20	.	48	790213
		5	.	20	.	49	1.06273e+06
		5	.	21	.	42	627134
		5	.	21	.	43	571974
		5	.	21	.	44	175479
		5	.	21	.	45	528524
		5	.	21	.	46	274877
		5	.	21	.	47	1.8075e+06
		5	.	21	.	48	790213
		5	.	21	.	49	1.06273e+06
		5	.	22	.	42	627134
		5	.	22	.	43	571974
		5	.	22	.	44	175479
		5	.	22	.	45	528524
		5	.	22	.	46	274877
		5	.	22	.	47	1.8075e+06
		5	.	22	.	48	790213
		5	.	22	.	49	1.06273e+06
		5	.	23	.	42	627134
		5	.	23	.	43	571974
		5	.	23	.	44	175479
		5	.	23	.	45	528524
		5	.	23	.	46	274877
		5	.	23	.	47	1.8075e+06
		5	.	23	.	48	790213
		5	.	23	.	49	1.06273e+06
		5	.	23	.	50	655096
		5	.	24	.	42	627134
		5	.	24	.	44	175479
		5	.	24	.	45	528524
		5	.	24	.	46	274877
		5	.	24	.	47	1.8075e+06
		5	.	24	.	48	790213
		5	.	24	.	49	1.06273e+06
		5	.	25	.	42	627134
		5	.	25	.	43	571974
		5	.	25	.	44	175479
		5	.	25	.	45	528524
		5	.	25	.	46	274877
		5	.	25	.	47	1.8075e+06
		5	.	25	.	48	790213
		5	.	25	.	49	1.06273e+06
		5	.	25	.	50	655096
		5	.	26	.	42	627134
		5	.	26	.	43	571974
		5	.	26	.	44	175479
		5	.	26	.	45	528524
		5	.	26	.	46	274877
		5	.	26	.	47	1.8075e+06
		5	.	26	.	48	790213
		5	.	26	.	49	1.06273e+06
		5	.	26	.	50	655096
		5	.	27	.	42	627134
		5	.	27	.	43	571974
		5	.	27	.	44	175479
		5	.	27	.	45	528524
		5	.	27	.	46	274877
		5	.	27	.	47	1.8075e+06
		5	.	27	.	48	790213
		5	.	27	.	49	1.06273e+06
		5	.	27	.	50	655096
		5	.	28	.	42	627134
		5	.	28	.	43	571974
		5	.	28	.	44	175479
		5	.	28	.	45	528524
		5	.	28	.	46	274877
		5	.	28	.	47	1.8075e+06
		5	.	28	.	48	790213
		5	.	28	.	49	1.06273e+06
		5	.	28	.	50	655096
		5	.	29	.	42	627134
		5	.	29	.	43	571974
		5	.	29	.	44	175479
		5	.	29	.	45	528524
		5	.	29	.	46	274877
		5	.	29	.	47	1.8075e+06
		5	.	29	.	48	790213
		5	.	29	.	49	1.06273e+06
		5	.	29	.	50	655096
		5	.	30	.	42	627134
		5	.	30	.	44	175479
		5	.	30	.	45	528524
		5	.	30	.	46	274877
		5	.	30	.	47	1.8075e+06
		5	.	30	.	48	790213
		5	.	30	.	49	1.06273e+06
		5	.	30	.	50	655096
		5	.	31	.	51	377815
		5	.	31	.	52	21875
		5	.	31	.	53	153431
		5	.	31	.	54	250969
		5	.	31	.	55	214156
		5	.	31	.	56	551867
		5	.	31	.	57	121177
		5	.	31	.	58	108875
		5	.	31	.	59	224845
		5	.	31	.	61	442442
		5	.	31	.	62	26092.5
		5	.	31	.	63	8138
		5	.	31	.	64	147454
		5	.	31	.	65	186572
		5	.	31	.	67	232472
		5	.	31	.	69	189049
		5	.	31	.	70	355287
		5	.	31	.	71	90569.2
		5	.	31	.	72	602115
		5	.	31	.	73	162994
		5	.	31	.	74	311172
		5	.	31	.	75	839817
		5	.	31	.	76	606521
		5	.	31	.	77	191017
		5	.	31	.	78	531829
		5	.	31	.	79	350462
		5	.	31	.	80	196823
		5	.	31	.	81	165092
		5	.	31	.	82	1.0671e+06
		5	.	31	.	83	625233
		5	.	31	.	84	351296
		5	.	31	.	85	711330
		5	.	31	.	86	633502
		5	.	31	.	87	157266
		5	.	31	.	88	228290
		5	.	31	.	89	966917
		5	.	31	.	90	1.16936e+06
		5	.	31	.	92	1.11841e+06
		5	.	31	.	93	165631
		5	.	31	.	94	969292
		5	.	31	.	95	176154
		5	.	31	.	96	179909
		5	.	31	.	99	83653.2
		5	.	32	.	51	377815
		5	.	32	.	52	21875
		5	.	32	.	53	153431
		5	.	32	.	54	250969
		5	.	32	.	55	214156
		5	.	32	.	56	551867
		5	.	32	.	57	121177
		5	.	32	.	58	108875
		5	.	32	.	59	224845
		5	.	32	.	60	33394
		5	.	32	.	61	442442
		5	.	32	.	62	26092.5
		5	.	32	.	63	8138
		5	.	32	.	64	147454
		5	.	32	.	65	186572
		5	.	32	.	66	63339.3
		5	.	32	.	67	232472
		5	.	32	.	68	37027
		5	.	32	.	69	189049
		5	.	32	.	70	355287
		5	.	32	.	71	90569.2
		5	.	32	.	72	602115
		5	.	32	.	73	162994
		5	.	32	.	74	311172
		5	.	32	.	75	839817
		5	.	32	.	76	606521
		5	.	32	.	77	191017
		5	.	32	.	78	531829
		5	.	32	.	79	350462
		5	.	32	.	80	196823
		5	.	32	.	81	165092
		5	.	32	.	82	1.0671e+06
		5	.	32	.	83	625233
		5	.	32	.	84	351296
		5	.	32	.	85	711330
		5	.	32	.	86	633502
		5	.	32	.	87	157266
		5	.	32	.	88	228290
		5	.	32	.	89	966917
		5	.	32	.	90	1.16936e+06
		5	.	32	.	94	969292
		5	.	32	.	96	179909
		5	.	32	.	99	83653.2
		5	.	33	.	51	377815
		5	.	33	.	52	21875
		5	.	33	.	53	153431
		5	.	33	.	54	250969
		5	.	33	.	55	214156
		5	.	33	.	56	551867
		5	.	33	.	57	121177
		5	.	33	.	58	108875
		5	.	33	.	59	224845
		5	.	33	.	60	33394
		5	.	33	.	61	442442
		5	.	33	.	62	26092.5
		5	.	33	.	63	8138
		5	.	33	.	64	147454
		5	.	33	.	65	186572
		5	.	33	.	66	63339.3
		5	.	33	.	67	232472
		5	.	33	.	68	37027
		5	.	33	.	69	189049
		5	.	33	.	70	355287
		5	.	33	.	71	90569.2
		5	.	33	.	72	602115
		5	.	33	.	73	162994
		5	.	33	.	74	311172
		5	.	33	.	75	839817
		5	.	33	.	76	606521
		5	.	33	.	77	191017
		5	.	33	.	78	531829
		5	.	33	.	79	350462
		5	.	33	.	80	196823
		5	.	33	.	81	165092
		5	.	33	.	82	1.0671e+06
		5	.	33	.	83	625233
		5	.	33	.	84	351296
		5	.	33	.	85	711330
		5	.	33	.	86	633502
		5	.	33	.	87	157266
		5	.	33	.	88	228290
		5	.	33	.	89	966917
		5	.	33	.	90	1.16936e+06
		5	.	33	.	93	165631
		5	.	33	.	94	969292
		5	.	33	.	96	179909
		5	.	33	.	99	83653.2
		5	.	34	.	51	377815
		5	.	34	.	52	21875
		5	.	34	.	53	153431
		5	.	34	.	54	250969
		5	.	34	.	55	214156
		5	.	34	.	56	551867
		5	.	34	.	57	121177
		5	.	34	.	58	108875
		5	.	34	.	59	224845
		5	.	34	.	61	442442
		5	.	34	.	62	26092.5
		5	.	34	.	63	8138
		5	.	34	.	64	147454
		5	.	34	.	65	186572
		5	.	34	.	67	232472
		5	.	34	.	69	189049
		5	.	34	.	70	355287
		5	.	34	.	71	90569.2
		5	.	34	.	72	602115
		5	.	34	.	73	162994
		5	.	34	.	74	311172
		5	.	34	.	75	839817
		5	.	34	.	76	606521
		5	.	34	.	77	191017
		5	.	34	.	78	531829
		5	.	34	.	79	350462
		5	.	34	.	80	196823
		5	.	34	.	81	165092
		5	.	34	.	82	1.0671e+06
		5	.	34	.	83	625233
		5	.	34	.	84	351296
		5	.	34	.	85	711330
		5	.	34	.	86	633502
		5	.	34	.	87	157266
		5	.	34	.	88	228290
		5	.	34	.	89	966917
		5	.	34	.	90	1.16936e+06
		5	.	34	.	91	153740
		5	.	34	.	92	1.11841e+06
		5	.	34	.	93	165631
		5	.	34	.	94	969292
		5	.	34	.	95	176154
		5	.	34	.	96	179909
		5	.	34	.	98	45537.3
		5	.	34	.	99	83653.2
		5	.	34	.	100	295816
		5	.	34	.	101	243972
		5	.	34	.	102	232599
		5	.	35	.	51	377815
		5	.	35	.	52	21875
		5	.	35	.	53	153431
		5	.	35	.	54	250969
		5	.	35	.	55	214156
		5	.	35	.	56	551867
		5	.	35	.	57	121177
		5	.	35	.	58	108875
		5	.	35	.	59	224845
		5	.	35	.	60	33394
		5	.	35	.	61	442442
		5	.	35	.	62	26092.5
		5	.	35	.	63	8138
		5	.	35	.	64	147454
		5	.	35	.	65	186572
		5	.	35	.	66	63339.3
		5	.	35	.	67	232472
		5	.	35	.	68	37027
		5	.	35	.	69	189049
		5	.	35	.	70	355287
		5	.	35	.	71	90569.2
		5	.	35	.	72	602115
		5	.	35	.	73	162994
		5	.	35	.	74	311172
		5	.	35	.	75	839817
		5	.	35	.	76	606521
		5	.	35	.	77	191017
		5	.	35	.	78	531829
		5	.	35	.	79	350462
		5	.	35	.	80	196823
		5	.	35	.	81	165092
		5	.	35	.	82	1.0671e+06
		5	.	35	.	83	625233
		5	.	35	.	84	351296
		5	.	35	.	85	711330
		5	.	35	.	86	633502
		5	.	35	.	87	157266
		5	.	35	.	88	228290
		5	.	35	.	89	966917
		5	.	35	.	90	1.16936e+06
		5	.	35	.	94	969292
		5	.	35	.	96	179909
		5	.	35	.	99	83653.2
		5	.	36	.	51	377815
		5	.	36	.	52	21875
		5	.	36	.	53	153431
		5	.	36	.	54	250969
		5	.	36	.	55	214156
		5	.	36	.	56	551867
		5	.	36	.	57	121177
		5	.	36	.	58	108875
		5	.	36	.	59	224845
		5	.	36	.	61	442442
		5	.	36	.	62	26092.5
		5	.	36	.	63	8138
		5	.	36	.	64	147454
		5	.	36	.	65	186572
		5	.	36	.	67	232472
		5	.	36	.	69	189049
		5	.	36	.	70	355287
		5	.	36	.	71	90569.2
		5	.	36	.	72	602115
		5	.	36	.	73	162994
		5	.	36	.	74	311172
		5	.	36	.	75	839817
		5	.	36	.	76	606521
		5	.	36	.	77	191017
		5	.	36	.	78	531829
		5	.	36	.	79	350462
		5	.	36	.	80	196823
		5	.	36	.	81	165092
		5	.	36	.	82	1.0671e+06
		5	.	36	.	83	625233
		5	.	36	.	84	351296
		5	.	36	.	85	711330
		5	.	36	.	86	633502
		5	.	36	.	87	157266
		5	.	36	.	88	228290
		5	.	36	.	89	966917
		5	.	36	.	90	1.16936e+06
		5	.	36	.	91	153740
		5	.	36	.	92	1.11841e+06
		5	.	36	.	93	165631
		5	.	36	.	94	969292
		5	.	36	.	95	176154
		5	.	36	.	96	179909
		5	.	36	.	97	196387
		5	.	36	.	98	45537.3
		5	.	36	.	99	83653.2
		5	.	36	.	100	295816
		5	.	36	.	101	243972
		5	.	36	.	102	232599
		5	.	37	.	51	377815
		5	.	37	.	52	21875
		5	.	37	.	53	153431
		5	.	37	.	54	250969
		5	.	37	.	55	214156
		5	.	37	.	56	551867
		5	.	37	.	57	121177
		5	.	37	.	58	108875
		5	.	37	.	61	442442
		5	.	37	.	62	26092.5
		5	.	37	.	63	8138
		5	.	37	.	64	147454
		5	.	37	.	65	186572
		5	.	37	.	67	232472
		5	.	37	.	69	189049
		5	.	37	.	70	355287
		5	.	37	.	71	90569.2
		5	.	37	.	72	602115
		5	.	37	.	73	162994
		5	.	37	.	74	311172
		5	.	37	.	75	839817
		5	.	37	.	76	606521
		5	.	37	.	77	191017
		5	.	37	.	78	531829
		5	.	37	.	79	350462
		5	.	37	.	80	196823
		5	.	37	.	81	165092
		5	.	37	.	82	1.0671e+06
		5	.	37	.	84	351296
		5	.	37	.	85	711330
		5	.	37	.	86	633502
		5	.	37	.	87	157266
		5	.	37	.	88	228290
		5	.	37	.	89	966917
		5	.	37	.	90	1.16936e+06
		5	.	37	.	91	153740
		5	.	37	.	92	1.11841e+06
		5	.	37	.	93	165631
		5	.	37	.	94	969292
		5	.	37	.	95	176154
		5	.	37	.	96	179909
		5	.	37	.	97	196387
		5	.	37	.	98	45537.3
		5	.	37	.	99	83653.2
		5	.	37	.	100	295816
		5	.	37	.	101	243972
		5	.	37	.	102	232599
		5	.	37	.	103	363392
		5	.	37	.	104	122076
		5	.	38	.	51	377815
		5	.	38	.	52	21875
		5	.	38	.	53	153431
		5	.	38	.	54	250969
		5	.	38	.	55	214156
		5	.	38	.	56	551867
		5	.	38	.	57	121177
		5	.	38	.	58	108875
		5	.	38	.	61	442442
		5	.	38	.	63	8138
		5	.	38	.	65	186572
		5	.	38	.	67	232472
		5	.	38	.	69	189049
		5	.	38	.	70	355287
		5	.	38	.	71	90569.2
		5	.	38	.	72	602115
		5	.	38	.	74	311172
		5	.	38	.	75	839817
		5	.	38	.	76	606521
		5	.	38	.	77	191017
		5	.	38	.	78	531829
		5	.	38	.	80	196823
		5	.	38	.	81	165092
		5	.	38	.	82	1.0671e+06
		5	.	38	.	84	351296
		5	.	38	.	85	711330
		5	.	38	.	87	157266
		5	.	38	.	89	966917
		5	.	38	.	90	1.16936e+06
		5	.	38	.	91	153740
		5	.	38	.	92	1.11841e+06
		5	.	38	.	93	165631
		5	.	38	.	94	969292
		5	.	38	.	95	176154
		5	.	38	.	96	179909
		5	.	38	.	97	196387
		5	.	38	.	98	45537.3
		5	.	38	.	99	83653.2
		5	.	38	.	100	295816
		5	.	38	.	101	243972
		5	.	38	.	102	232599
		5	.	38	.	103	363392
		5	.	38	.	104	122076
		5	.	39	.	51	377815
		5	.	39	.	52	21875
		5	.	39	.	54	250969
		5	.	39	.	55	214156
		5	.	39	.	56	551867
		5	.	39	.	57	121177
		5	.	39	.	58	108875
		5	.	39	.	59	224845
		5	.	39	.	60	33394
		5	.	39	.	61	442442
		5	.	39	.	62	26092.5
		5	.	39	.	63	8138
		5	.	39	.	64	147454
		5	.	39	.	65	186572
		5	.	39	.	66	63339.3
		5	.	39	.	67	232472
		5	.	39	.	68	37027
		5	.	39	.	69	189049
		5	.	39	.	70	355287
		5	.	39	.	71	90569.2
		5	.	39	.	72	602115
		5	.	39	.	73	162994
		5	.	39	.	74	311172
		5	.	39	.	75	839817
		5	.	39	.	76	606521
		5	.	39	.	77	191017
		5	.	39	.	78	531829
		5	.	39	.	79	350462
		5	.	39	.	80	196823
		5	.	39	.	81	165092
		5	.	39	.	82	1.0671e+06
		5	.	39	.	83	625233
		5	.	39	.	84	351296
		5	.	39	.	86	633502
		5	.	39	.	87	157266
		5	.	39	.	88	228290
		5	.	39	.	89	966917
		5	.	39	.	99	83653.2
		5	.	40	.	53	153431
		5	.	40	.	56	551867
		5	.	40	.	58	108875
		5	.	40	.	61	442442
		5	.	40	.	63	8138
		5	.	40	.	65	186572
		5	.	40	.	67	232472
		5	.	40	.	69	189049
		5	.	40	.	70	355287
		5	.	40	.	72	602115
		5	.	40	.	74	311172
		5	.	40	.	75	839817
		5	.	40	.	76	606521
		5	.	40	.	77	191017
		5	.	40	.	78	531829
		5	.	40	.	80	196823
		5	.	40	.	81	165092
		5	.	40	.	82	1.0671e+06
		5	.	40	.	85	711330
		5	.	40	.	87	157266
		5	.	40	.	89	966917
		5	.	40	.	90	1.16936e+06
		5	.	40	.	91	153740
		5	.	40	.	92	1.11841e+06
		5	.	40	.	93	165631
		5	.	40	.	94	969292
		5	.	40	.	95	176154
		5	.	40	.	96	179909
		5	.	40	.	97	196387
		5	.	40	.	98	45537.3
		5	.	40	.	99	83653.2
		5	.	40	.	100	295816
		5	.	40	.	101	243972
		5	.	40	.	102	232599
		5	.	40	.	103	363392
		5	.	40	.	104	122076
		5	.	40	.	105	175118
		5	.	41	.	52	21875
		5	.	41	.	53	153431
		5	.	41	.	54	250969
		5	.	41	.	55	214156
		5	.	41	.	56	551867
		5	.	41	.	57	121177
		5	.	41	.	58	108875
		5	.	41	.	61	442442
		5	.	41	.	62	26092.5
		5	.	41	.	63	8138
		5	.	41	.	64	147454
		5	.	41	.	65	186572
		5	.	41	.	67	232472
		5	.	41	.	69	189049
		5	.	41	.	70	355287
		5	.	41	.	71	90569.2
		5	.	41	.	72	602115
		5	.	41	.	73	162994
		5	.	41	.	74	311172
		5	.	41	.	75	839817
		5	.	41	.	76	606521
		5	.	41	.	77	191017
		5	.	41	.	78	531829
		5	.	41	.	79	350462
		5	.	41	.	80	196823
		5	.	41	.	81	165092
		5	.	41	.	82	1.0671e+06
		5	.	41	.	84	351296
		5	.	41	.	85	711330
		5	.	41	.	87	157266
		5	.	41	.	88	228290
		5	.	41	.	89	966917
		5	.	41	.	90	1.16936e+06
		5	.	41	.	91	153740
		5	.	41	.	92	1.11841e+06
		5	.	41	.	93	165631
		5	.	41	.	94	969292
		5	.	41	.	95	176154
		5	.	41	.	96	179909
		5	.	41	.	97	196387
		5	.	41	.	98	45537.3
		5	.	41	.	99	83653.2
		5	.	41	.	100	295816
		5	.	41	.	101	243972
		5	.	41	.	102	232599
		5	.	41	.	103	363392
		5	.	41	.	104	122076
		5	.	41	.	105	175118
		5	.	41	.	106	560867
		5	.	42	.	52	21875
		5	.	42	.	53	153431
		5	.	42	.	54	250969
		5	.	42	.	55	214156
		5	.	42	.	56	551867
		5	.	42	.	57	121177
		5	.	42	.	58	108875
		5	.	42	.	61	442442
		5	.	42	.	62	26092.5
		5	.	42	.	63	8138
		5	.	42	.	64	147454
		5	.	42	.	65	186572
		5	.	42	.	67	232472
		5	.	42	.	69	189049
		5	.	42	.	70	355287
		5	.	42	.	71	90569.2
		5	.	42	.	72	602115
		5	.	42	.	73	162994
		5	.	42	.	74	311172
		5	.	42	.	75	839817
		5	.	42	.	76	606521
		5	.	42	.	77	191017
		5	.	42	.	78	531829
		5	.	42	.	79	350462
		5	.	42	.	80	196823
		5	.	42	.	81	165092
		5	.	42	.	82	1.0671e+06
		5	.	42	.	84	351296
		5	.	42	.	85	711330
		5	.	42	.	86	633502
		5	.	42	.	87	157266
		5	.	42	.	88	228290
		5	.	42	.	89	966917
		5	.	42	.	90	1.16936e+06
		5	.	42	.	91	153740
		5	.	42	.	92	1.11841e+06
		5	.	42	.	93	165631
		5	.	42	.	94	969292
		5	.	42	.	95	176154
		5	.	42	.	96	179909
		5	.	42	.	97	196387
		5	.	42	.	98	45537.3
		5	.	42	.	99	83653.2
		5	.	42	.	100	295816
		5	.	42	.	101	243972
		5	.	42	.	102	232599
		5	.	42	.	103	363392
		5	.	42	.	104	122076
		5	.	42	.	105	175118
		5	.	42	.	106	560867
		5	.	43	.	53	153431
		5	.	43	.	54	250969
		5	.	43	.	55	214156
		5	.	43	.	56	551867
		5	.	43	.	57	121177
		5	.	43	.	58	108875
		5	.	43	.	61	442442
		5	.	43	.	63	8138
		5	.	43	.	65	186572
		5	.	43	.	67	232472
		5	.	43	.	69	189049
		5	.	43	.	70	355287
		5	.	43	.	71	90569.2
		5	.	43	.	72	602115
		5	.	43	.	74	311172
		5	.	43	.	75	839817
		5	.	43	.	76	606521
		5	.	43	.	77	191017
		5	.	43	.	78	531829
		5	.	43	.	80	196823
		5	.	43	.	81	165092
		5	.	43	.	82	1.0671e+06
		5	.	43	.	84	351296
		5	.	43	.	85	711330
		5	.	43	.	87	157266
		5	.	43	.	88	228290
		5	.	43	.	89	966917
		5	.	43	.	90	1.16936e+06
		5	.	43	.	91	153740
		5	.	43	.	92	1.11841e+06
		5	.	43	.	93	165631
		5	.	43	.	94	969292
		5	.	43	.	95	176154
		5	.	43	.	96	179909
		5	.	43	.	97	196387
		5	.	43	.	98	45537.3
		5	.	43	.	99	83653.2
		5	.	43	.	100	295816
		5	.	43	.	101	243972
		5	.	43	.	102	232599
		5	.	43	.	103	363392
		5	.	43	.	104	122076
		5	.	43	.	105	175118
		5	.	43	.	106	560867
		5	.	44	.	53	153431
		5	.	44	.	63	8138
		5	.	44	.	67	232472
		5	.	44	.	70	355287
		5	.	44	.	72	602115
		5	.	44	.	75	839817
		5	.	44	.	76	606521
		5	.	44	.	77	191017
		5	.	44	.	78	531829
		5	.	44	.	80	196823
		5	.	44	.	81	165092
		5	.	44	.	82	1.0671e+06
		5	.	44	.	85	711330
		5	.	44	.	89	966917
		5	.	44	.	90	1.16936e+06
		5	.	44	.	91	153740
		5	.	44	.	92	1.11841e+06
		5	.	44	.	93	165631
		5	.	44	.	94	969292
		5	.	44	.	95	176154
		5	.	44	.	96	179909
		5	.	44	.	97	196387
		5	.	44	.	98	45537.3
		5	.	44	.	99	83653.2
		5	.	44	.	100	295816
		5	.	44	.	101	243972
		5	.	44	.	102	232599
		5	.	44	.	103	363392
		5	.	44	.	104	122076
		5	.	44	.	105	175118
		5	.	45	.	53	153431
		5	.	45	.	63	8138
		5	.	45	.	67	232472
		5	.	45	.	70	355287
		5	.	45	.	72	602115
		5	.	45	.	75	839817
		5	.	45	.	76	606521
		5	.	45	.	77	191017
		5	.	45	.	78	531829
		5	.	45	.	80	196823
		5	.	45	.	81	165092
		5	.	45	.	82	1.0671e+06
		5	.	45	.	85	711330
		5	.	45	.	89	966917
		5	.	45	.	90	1.16936e+06
		5	.	45	.	91	153740
		5	.	45	.	92	1.11841e+06
		5	.	45	.	93	165631
		5	.	45	.	94	969292
		5	.	45	.	95	176154
		5	.	45	.	96	179909
		5	.	45	.	97	196387
		5	.	45	.	98	45537.3
		5	.	45	.	99	83653.2
		5	.	45	.	100	295816
		5	.	45	.	101	243972
		5	.	45	.	102	232599
		5	.	45	.	103	363392
		5	.	45	.	104	122076
		5	.	45	.	105	175118
		5	.	46	.	53	153431
		5	.	46	.	56	551867
		5	.	46	.	58	108875
		5	.	46	.	61	442442
		5	.	46	.	63	8138
		5	.	46	.	65	186572
		5	.	46	.	67	232472
		5	.	46	.	69	189049
		5	.	46	.	70	355287
		5	.	46	.	72	602115
		5	.	46	.	74	311172
		5	.	46	.	75	839817
		5	.	46	.	76	606521
		5	.	46	.	77	191017
		5	.	46	.	78	531829
		5	.	46	.	80	196823
		5	.	46	.	81	165092
		5	.	46	.	82	1.0671e+06
		5	.	46	.	84	351296
		5	.	46	.	85	711330
		5	.	46	.	87	157266
		5	.	46	.	88	228290
		5	.	46	.	89	966917
		5	.	46	.	90	1.16936e+06
		5	.	46	.	91	153740
		5	.	46	.	92	1.11841e+06
		5	.	46	.	93	165631
		5	.	46	.	94	969292
		5	.	46	.	95	176154
		5	.	46	.	96	179909
		5	.	46	.	97	196387
		5	.	46	.	98	45537.3
		5	.	46	.	99	83653.2
		5	.	46	.	100	295816
		5	.	46	.	101	243972
		5	.	46	.	102	232599
		5	.	46	.	103	363392
		5	.	46	.	104	122076
		5	.	46	.	105	175118
		5	.	46	.	106	560867
		5	.	47	.	61	442442
		5	.	47	.	63	8138
		5	.	47	.	65	186572
		5	.	47	.	67	232472
		5	.	47	.	69	189049
		5	.	47	.	70	355287
		5	.	47	.	72	602115
		5	.	47	.	74	311172
		5	.	47	.	75	839817
		5	.	47	.	76	606521
		5	.	47	.	77	191017
		5	.	47	.	78	531829
		5	.	47	.	80	196823
		5	.	47	.	81	165092
		5	.	47	.	82	1.0671e+06
		5	.	47	.	84	351296
		5	.	47	.	85	711330
		5	.	47	.	87	157266
		5	.	47	.	88	228290
		5	.	47	.	89	966917
		5	.	47	.	90	1.16936e+06
		5	.	47	.	91	153740
		5	.	47	.	92	1.11841e+06
		5	.	47	.	93	165631
		5	.	47	.	94	969292
		5	.	47	.	95	176154
		5	.	47	.	96	179909
		5	.	47	.	97	196387
		5	.	47	.	98	45537.3
		5	.	47	.	99	83653.2
		5	.	47	.	100	295816
		5	.	47	.	101	243972
		5	.	47	.	102	232599
		5	.	47	.	103	363392
		5	.	47	.	104	122076
		5	.	47	.	105	175118
		5	.	47	.	106	560867
		5	.	47	.	107	528737
		5	.	48	.	58	108875
		5	.	48	.	61	442442
		5	.	48	.	63	8138
		5	.	48	.	65	186572
		5	.	48	.	67	232472
		5	.	48	.	69	189049
		5	.	48	.	70	355287
		5	.	48	.	71	90569.2
		5	.	48	.	72	602115
		5	.	48	.	74	311172
		5	.	48	.	75	839817
		5	.	48	.	76	606521
		5	.	48	.	77	191017
		5	.	48	.	78	531829
		5	.	48	.	79	350462
		5	.	48	.	80	196823
		5	.	48	.	81	165092
		5	.	48	.	82	1.0671e+06
		5	.	48	.	84	351296
		5	.	48	.	85	711330
		5	.	48	.	86	633502
		5	.	48	.	87	157266
		5	.	48	.	88	228290
		5	.	48	.	89	966917
		5	.	48	.	90	1.16936e+06
		5	.	48	.	91	153740
		5	.	48	.	92	1.11841e+06
		5	.	48	.	93	165631
		5	.	48	.	94	969292
		5	.	48	.	95	176154
		5	.	48	.	96	179909
		5	.	48	.	97	196387
		5	.	48	.	98	45537.3
		5	.	48	.	99	83653.2
		5	.	48	.	100	295816
		5	.	48	.	101	243972
		5	.	48	.	102	232599
		5	.	48	.	103	363392
		5	.	48	.	104	122076
		5	.	48	.	105	175118
		5	.	48	.	106	560867
		5	.	49	.	72	602115
		5	.	49	.	75	839817
		5	.	49	.	78	531829
		5	.	49	.	82	1.0671e+06
		5	.	49	.	85	711330
		5	.	49	.	89	966917
		5	.	49	.	90	1.16936e+06
		5	.	49	.	91	153740
		5	.	49	.	92	1.11841e+06
		5	.	49	.	93	165631
		5	.	49	.	94	969292
		5	.	49	.	95	176154
		5	.	49	.	96	179909
		5	.	49	.	97	196387
		5	.	49	.	98	45537.3
		5	.	49	.	99	83653.2
		5	.	49	.	100	295816
		5	.	49	.	101	243972
		5	.	49	.	102	232599
		5	.	49	.	103	363392
		5	.	49	.	104	122076
		5	.	49	.	105	175118
		5	.	49	.	106	560867
		5	.	49	.	107	528737
		5	.	50	.	78	531829
		5	.	50	.	82	1.0671e+06
		5	.	50	.	85	711330
		5	.	50	.	89	966917
		5	.	50	.	90	1.16936e+06
		5	.	50	.	91	153740
		5	.	50	.	92	1.11841e+06
		5	.	50	.	93	165631
		5	.	50	.	94	969292
		5	.	50	.	95	176154
		5	.	50	.	96	179909
		5	.	50	.	97	196387
		5	.	50	.	98	45537.3
		5	.	50	.	99	83653.2
		5	.	50	.	100	295816
		5	.	50	.	101	243972
		5	.	50	.	102	232599
		5	.	50	.	103	363392
		5	.	50	.	104	122076
		5	.	50	.	105	175118
		5	.	50	.	106	560867
		5	.	50	.	107	528737
		5	.	51	.	82	1.0671e+06
		5	.	51	.	85	711330
		5	.	51	.	89	966917
		5	.	51	.	90	1.16936e+06
		5	.	51	.	91	153740
		5	.	51	.	92	1.11841e+06
		5	.	51	.	93	165631
		5	.	51	.	94	969292
		5	.	51	.	95	176154
		5	.	51	.	96	179909
		5	.	51	.	97	196387
		5	.	51	.	98	45537.3
		5	.	51	.	99	83653.2
		5	.	51	.	100	295816
		5	.	51	.	101	243972
		5	.	51	.	102	232599
		5	.	51	.	103	363392
		5	.	51	.	104	122076
		5	.	51	.	107	528737
		5	.	52	.	78	531829
		5	.	52	.	80	196823
		5	.	52	.	82	1.0671e+06
		5	.	52	.	85	711330
		5	.	52	.	89	966917
		5	.	52	.	90	1.16936e+06
		5	.	52	.	91	153740
		5	.	52	.	92	1.11841e+06
		5	.	52	.	93	165631
		5	.	52	.	94	969292
		5	.	52	.	95	176154
		5	.	52	.	96	179909
		5	.	52	.	97	196387
		5	.	52	.	98	45537.3
		5	.	52	.	99	83653.2
		5	.	52	.	100	295816
		5	.	52	.	101	243972
		5	.	52	.	102	232599
		5	.	52	.	103	363392
		5	.	52	.	104	122076
		5	.	52	.	105	175118
		5	.	52	.	106	560867
		5	.	52	.	107	528737
		5	.	53	.	72	602115
		5	.	53	.	75	839817
		5	.	53	.	77	191017
		5	.	53	.	78	531829
		5	.	53	.	80	196823
		5	.	53	.	82	1.0671e+06
		5	.	53	.	85	711330
		5	.	53	.	87	157266
		5	.	53	.	89	966917
		5	.	53	.	90	1.16936e+06
		5	.	53	.	91	153740
		5	.	53	.	92	1.11841e+06
		5	.	53	.	93	165631
		5	.	53	.	94	969292
		5	.	53	.	95	176154
		5	.	53	.	96	179909
		5	.	53	.	97	196387
		5	.	53	.	98	45537.3
		5	.	53	.	99	83653.2
		5	.	53	.	100	295816
		5	.	53	.	101	243972
		5	.	53	.	102	232599
		5	.	53	.	103	363392
		5	.	53	.	104	122076
		5	.	53	.	105	175118
		5	.	53	.	106	560867
		5	.	53	.	107	528737
		5	.	54	.	72	602115
		5	.	54	.	75	839817
		5	.	54	.	76	606521
		5	.	54	.	77	191017
		5	.	54	.	78	531829
		5	.	54	.	80	196823
		5	.	54	.	81	165092
		5	.	54	.	82	1.0671e+06
		5	.	54	.	85	711330
		5	.	54	.	87	157266
		5	.	54	.	89	966917
		5	.	54	.	90	1.16936e+06
		5	.	54	.	91	153740
		5	.	54	.	92	1.11841e+06
		5	.	54	.	93	165631
		5	.	54	.	94	969292
		5	.	54	.	95	176154
		5	.	54	.	96	179909
		5	.	54	.	97	196387
		5	.	54	.	98	45537.3
		5	.	54	.	99	83653.2
		5	.	54	.	100	295816
		5	.	54	.	101	243972
		5	.	54	.	102	232599
		5	.	54	.	103	363392
		5	.	54	.	104	122076
		5	.	54	.	105	175118
		5	.	54	.	106	560867
		5	.	54	.	107	528737
		5	.	55	.	82	1.0671e+06
		5	.	55	.	85	711330
		5	.	55	.	89	966917
		5	.	55	.	90	1.16936e+06
		5	.	55	.	91	153740
		5	.	55	.	92	1.11841e+06
		5	.	55	.	93	165631
		5	.	55	.	94	969292
		5	.	55	.	95	176154
		5	.	55	.	96	179909
		5	.	55	.	97	196387
		5	.	55	.	98	45537.3
		5	.	55	.	99	83653.2
		5	.	55	.	100	295816
		5	.	55	.	101	243972
		5	.	55	.	102	232599
		5	.	55	.	103	363392
		5	.	55	.	104	122076
		5	.	55	.	105	175118
		5	.	55	.	106	560867
		5	.	55	.	107	528737
		5	.	56	.	77	191017
		5	.	56	.	78	531829
		5	.	56	.	80	196823
		5	.	56	.	82	1.0671e+06
		5	.	56	.	85	711330
		5	.	56	.	87	157266
		5	.	56	.	89	966917
		5	.	56	.	90	1.16936e+06
		5	.	56	.	91	153740
		5	.	56	.	92	1.11841e+06
		5	.	56	.	93	165631
		5	.	56	.	94	969292
		5	.	56	.	95	176154
		5	.	56	.	96	179909
		5	.	56	.	97	196387
		5	.	56	.	98	45537.3
		5	.	56	.	99	83653.2
		5	.	56	.	100	295816
		5	.	56	.	101	243972
		5	.	56	.	102	232599
		5	.	56	.	103	363392
		5	.	56	.	104	122076
		5	.	56	.	105	175118
		5	.	56	.	106	560867
		5	.	56	.	107	528737
		5	.	57	.	82	1.0671e+06
		5	.	57	.	85	711330
		5	.	57	.	89	966917
		5	.	57	.	90	1.16936e+06
		5	.	57	.	91	153740
		5	.	57	.	92	1.11841e+06
		5	.	57	.	93	165631
		5	.	57	.	94	969292
		5	.	57	.	95	176154
		5	.	57	.	96	179909
		5	.	57	.	97	196387
		5	.	57	.	98	45537.3
		5	.	57	.	99	83653.2
		5	.	57	.	100	295816
		5	.	57	.	101	243972
		5	.	57	.	102	232599
		5	.	57	.	103	363392
		5	.	57	.	104	122076
		5	.	57	.	105	175118
		5	.	57	.	106	560867
		5	.	57	.	107	528737
		5	.	58	.	82	1.0671e+06
		5	.	58	.	85	711330
		5	.	58	.	89	966917
		5	.	58	.	90	1.16936e+06
		5	.	58	.	91	153740
		5	.	58	.	92	1.11841e+06
		5	.	58	.	93	165631
		5	.	58	.	94	969292
		5	.	58	.	95	176154
		5	.	58	.	96	179909
		5	.	58	.	97	196387
		5	.	58	.	98	45537.3
		5	.	58	.	99	83653.2
		5	.	58	.	100	295816
		5	.	58	.	101	243972
		5	.	58	.	102	232599
		5	.	58	.	103	363392
		5	.	58	.	104	122076
		5	.	58	.	105	175118
		5	.	58	.	106	560867
		5	.	58	.	107	528737
		5	.	59	.	108	1.09432e+06
		5	.	60	.	108	1.09432e+06
		5	.	61	.	109	866116
		5	.	61	.	111	162556
		5	.	61	.	112	409360
		5	.	61	.	113	184363
		5	.	62	.	109	866116
		5	.	62	.	111	162556
		5	.	62	.	112	409360
		5	.	62	.	113	184363
		5	.	63	.	109	866116
		5	.	63	.	111	162556
		5	.	63	.	112	409360
		5	.	63	.	113	184363
		5	.	64	.	109	866116
		5	.	64	.	111	162556
		5	.	64	.	112	409360
		5	.	64	.	113	184363
		5	.	65	.	109	866116
		5	.	65	.	111	162556
		5	.	65	.	112	409360
		5	.	65	.	113	184363
		5	.	66	.	110	634891
		5	.	67	.	109	866116
		5	.	67	.	111	162556
		5	.	67	.	112	409360
		5	.	67	.	113	184363
		5	.	68	.	109	866116
		5	.	68	.	111	162556
		5	.	68	.	112	409360
		5	.	68	.	113	184363
		7	.	69	.	114	3112.83
		7	.	69	.	115	4358.33
		7	.	69	.	116	2550.17
		7	.	69	.	117	3958.67
		7	.	69	.	118	3714
		7	.	69	.	119	10736.3
		7	.	69	.	120	6672.17
		7	.	69	.	121	5482.33
		7	.	69	.	122	2916.83
		7	.	69	.	123	2916
		7	.	69	.	124	3384.33
		7	.	69	.	125	8881.67
		7	.	69	.	126	15073.8
		7	.	69	.	127	8705.33
		7	.	69	.	128	2799.33
		7	.	69	.	129	3957.33
		7	.	69	.	130	15240.5
		7	.	69	.	131	7983
		7	.	69	.	132	25665.3
		7	.	69	.	133	13022.2
		7	.	69	.	134	2254.33
		7	.	69	.	135	31807.2
		7	.	69	.	136	5661.17
		7	.	69	.	137	2359.67
		7	.	69	.	138	7207.17
		7	.	69	.	139	18268
		7	.	69	.	140	17692.2
		7	.	69	.	141	1674.5
		7	.	69	.	142	2541.5
		7	.	69	.	143	3539
		7	.	69	.	144	3883.17
		7	.	69	.	145	26102.3
		7	.	69	.	146	1601.33
		7	.	69	.	147	1736
		7	.	69	.	148	11115.7
		7	.	69	.	149	4436.67
		7	.	69	.	150	791.667
		7	.	69	.	151	2473.17
		7	.	69	.	152	149.667
		7	.	69	.	153	2223.5
		7	.	69	.	154	4217.5
		7	.	69	.	155	14625.3
		7	.	69	.	156	1004.17
		7	.	69	.	157	829.167
		1	.	70	.	158	826486
		1	.	70	.	159	911151
		1	.	70	.	160	239821
		1	.	70	.	161	252202
		1	.	71	.	158	826486
		1	.	71	.	159	911151
		1	.	71	.	160	239821
		1	.	71	.	161	252202
		1	.	71	.	162	114610
		1	.	72	.	158	826486
		1	.	72	.	159	911151
		1	.	72	.	160	239821
		1	.	72	.	161	252202
		1	.	72	.	162	114610
		1	.	73	.	158	826486
		1	.	73	.	159	911151
		1	.	73	.	160	239821
		1	.	73	.	161	252202
		1	.	73	.	162	114610
		1	.	74	.	158	826486
		1	.	74	.	159	911151
		1	.	74	.	160	239821
		1	.	74	.	161	252202
		1	.	74	.	162	114610
		1	.	75	.	158	826486
		1	.	75	.	159	911151
		1	.	75	.	160	239821
		1	.	75	.	161	252202
		1	.	75	.	162	114610
		1	.	76	.	158	826486
		1	.	76	.	159	911151
		1	.	76	.	160	239821
		1	.	76	.	161	252202
		1	.	76	.	162	114610
		1	.	77	.	158	826486
		1	.	77	.	159	911151
		1	.	77	.	160	239821
		1	.	77	.	161	252202
		1	.	77	.	162	114610
		1	.	78	.	158	826486
		1	.	78	.	159	911151
		1	.	78	.	160	239821
		1	.	78	.	161	252202
		1	.	78	.	162	114610
		1	.	79	.	158	826486
		1	.	79	.	159	911151
		1	.	79	.	160	239821
		1	.	79	.	161	252202
		1	.	79	.	162	114610
		1	.	80	.	158	826486
		1	.	80	.	159	911151
		1	.	80	.	160	239821
		1	.	80	.	161	252202
		1	.	80	.	162	114610
		1	.	81	.	158	826486
		1	.	81	.	159	911151
		1	.	81	.	160	239821
		1	.	81	.	161	252202
		1	.	81	.	162	114610
		1	.	82	.	159	911151
		1	.	82	.	160	239821
		1	.	82	.	161	252202
		1	.	82	.	162	114610
		1	.	83	.	159	911151
		1	.	83	.	160	239821
		1	.	83	.	161	252202
		1	.	83	.	162	114610
		1	.	84	.	159	911151
		1	.	84	.	160	239821
		1	.	84	.	161	252202
		1	.	84	.	162	114610
		1	.	85	.	163	50754
		1	.	85	.	164	24393.8
		1	.	85	.	166	25999.5
		1	.	85	.	169	35741.2
		1	.	85	.	171	18666.2
		1	.	85	.	173	41394
		1	.	85	.	176	80807.7
		1	.	85	.	177	18817.3
		1	.	85	.	178	23328.2
		1	.	85	.	181	39073.5
		1	.	86	.	163	50754
		1	.	86	.	164	24393.8
		1	.	86	.	166	25999.5
		1	.	86	.	171	18666.2
		1	.	86	.	173	41394
		1	.	86	.	176	80807.7
		1	.	86	.	177	18817.3
		1	.	86	.	178	23328.2
		1	.	86	.	181	39073.5
		1	.	87	.	163	50754
		1	.	87	.	164	24393.8
		1	.	87	.	166	25999.5
		1	.	87	.	169	35741.2
		1	.	87	.	171	18666.2
		1	.	87	.	173	41394
		1	.	87	.	176	80807.7
		1	.	87	.	177	18817.3
		1	.	87	.	178	23328.2
		1	.	87	.	181	39073.5
		1	.	88	.	163	50754
		1	.	88	.	165	12028.7
		1	.	88	.	166	25999.5
		1	.	88	.	167	47112.8
		1	.	88	.	169	35741.2
		1	.	88	.	170	51849
		1	.	88	.	171	18666.2
		1	.	88	.	172	33779.7
		1	.	88	.	173	41394
		1	.	88	.	174	11697.2
		1	.	88	.	175	3701.67
		1	.	88	.	176	80807.7
		1	.	88	.	177	18817.3
		1	.	88	.	178	23328.2
		1	.	88	.	181	39073.5
		1	.	88	.	182	8721.67
		1	.	88	.	183	100885
		1	.	88	.	184	34151.8
		1	.	88	.	185	12880.3
		1	.	88	.	186	41376.3
		1	.	88	.	187	8707
		1	.	88	.	188	10914.5
		1	.	88	.	189	12185.5
		1	.	88	.	190	35724.7
		1	.	88	.	191	8902.67
		1	.	88	.	192	11263.5
		1	.	88	.	193	3715.5
		1	.	88	.	194	20386.8
		1	.	88	.	195	2609.83
		1	.	88	.	196	69975.8
		1	.	88	.	197	17527
		1	.	88	.	200	19468.8
		1	.	88	.	201	86977.3
		1	.	88	.	202	32307.5
		1	.	88	.	204	44541.2
		1	.	89	.	163	50754
		1	.	89	.	165	12028.7
		1	.	89	.	166	25999.5
		1	.	89	.	167	47112.8
		1	.	89	.	169	35741.2
		1	.	89	.	170	51849
		1	.	89	.	171	18666.2
		1	.	89	.	172	33779.7
		1	.	89	.	173	41394
		1	.	89	.	174	11697.2
		1	.	89	.	175	3701.67
		1	.	89	.	176	80807.7
		1	.	89	.	177	18817.3
		1	.	89	.	178	23328.2
		1	.	89	.	181	39073.5
		1	.	89	.	182	8721.67
		1	.	89	.	183	100885
		1	.	89	.	184	34151.8
		1	.	89	.	185	12880.3
		1	.	89	.	186	41376.3
		1	.	89	.	187	8707
		1	.	89	.	188	10914.5
		1	.	89	.	189	12185.5
		1	.	89	.	190	35724.7
		1	.	89	.	191	8902.67
		1	.	89	.	192	11263.5
		1	.	89	.	193	3715.5
		1	.	89	.	194	20386.8
		1	.	89	.	195	2609.83
		1	.	89	.	196	69975.8
		1	.	89	.	197	17527
		1	.	89	.	200	19468.8
		1	.	89	.	201	86977.3
		1	.	89	.	202	32307.5
		1	.	89	.	203	33482.5
		1	.	89	.	204	44541.2
		1	.	89	.	205	33597.2
		1	.	89	.	206	40572.3
		1	.	89	.	208	6453.33
		1	.	90	.	168	96737.2
		1	.	90	.	179	127008
		1	.	90	.	180	124495
		1	.	91	.	168	96737.2
		1	.	91	.	179	127008
		1	.	91	.	180	124495
		1	.	92	.	168	96737.2
		1	.	92	.	179	127008
		1	.	92	.	180	124495
		1	.	93	.	179	127008
		1	.	93	.	180	124495
		1	.	94	.	168	96737.2
		1	.	94	.	179	127008
		1	.	94	.	180	124495
		1	.	95	.	179	127008
		1	.	95	.	180	124495
		1	.	96	.	168	96737.2
		1	.	96	.	179	127008
		1	.	96	.	180	124495
		1	.	97	.	163	50754
		1	.	97	.	165	12028.7
		1	.	97	.	166	25999.5
		1	.	97	.	167	47112.8
		1	.	97	.	169	35741.2
		1	.	97	.	170	51849
		1	.	97	.	171	18666.2
		1	.	97	.	172	33779.7
		1	.	97	.	173	41394
		1	.	97	.	174	11697.2
		1	.	97	.	175	3701.67
		1	.	97	.	176	80807.7
		1	.	97	.	177	18817.3
		1	.	97	.	178	23328.2
		1	.	97	.	181	39073.5
		1	.	97	.	182	8721.67
		1	.	97	.	183	100885
		1	.	97	.	184	34151.8
		1	.	97	.	185	12880.3
		1	.	97	.	186	41376.3
		1	.	97	.	189	12185.5
		1	.	97	.	190	35724.7
		1	.	97	.	191	8902.67
		1	.	97	.	192	11263.5
		1	.	97	.	193	3715.5
		1	.	97	.	194	20386.8
		1	.	97	.	195	2609.83
		1	.	97	.	196	69975.8
		1	.	97	.	197	17527
		1	.	97	.	198	96566.5
		1	.	97	.	200	19468.8
		1	.	97	.	201	86977.3
		1	.	97	.	202	32307.5
		1	.	97	.	204	44541.2
		1	.	97	.	205	33597.2
		1	.	97	.	206	40572.3
		1	.	97	.	207	70248.2
		1	.	97	.	208	6453.33
		1	.	97	.	209	7954.83
		1	.	97	.	211	8264
		1	.	97	.	213	13920.7
		1	.	97	.	214	82920.5
		1	.	97	.	215	79122.2
		1	.	97	.	216	10247.7
		1	.	98	.	163	50754
		1	.	98	.	165	12028.7
		1	.	98	.	166	25999.5
		1	.	98	.	167	47112.8
		1	.	98	.	169	35741.2
		1	.	98	.	170	51849
		1	.	98	.	171	18666.2
		1	.	98	.	172	33779.7
		1	.	98	.	173	41394
		1	.	98	.	174	11697.2
		1	.	98	.	175	3701.67
		1	.	98	.	176	80807.7
		1	.	98	.	177	18817.3
		1	.	98	.	178	23328.2
		1	.	98	.	181	39073.5
		1	.	98	.	182	8721.67
		1	.	98	.	183	100885
		1	.	98	.	184	34151.8
		1	.	98	.	185	12880.3
		1	.	98	.	189	12185.5
		1	.	98	.	190	35724.7
		1	.	98	.	191	8902.67
		1	.	98	.	192	11263.5
		1	.	98	.	193	3715.5
		1	.	98	.	194	20386.8
		1	.	98	.	195	2609.83
		1	.	98	.	197	17527
		1	.	98	.	198	96566.5
		1	.	98	.	200	19468.8
		1	.	98	.	201	86977.3
		1	.	98	.	202	32307.5
		1	.	98	.	204	44541.2
		1	.	98	.	205	33597.2
		1	.	98	.	206	40572.3
		1	.	98	.	207	70248.2
		1	.	98	.	208	6453.33
		1	.	98	.	209	7954.83
		1	.	98	.	211	8264
		1	.	98	.	213	13920.7
		1	.	98	.	214	82920.5
		1	.	98	.	215	79122.2
		1	.	99	.	179	127008
		1	.	99	.	180	124495
		1	.	100	.	165	12028.7
		1	.	100	.	166	25999.5
		1	.	100	.	167	47112.8
		1	.	100	.	169	35741.2
		1	.	100	.	170	51849
		1	.	100	.	171	18666.2
		1	.	100	.	172	33779.7
		1	.	100	.	173	41394
		1	.	100	.	174	11697.2
		1	.	100	.	175	3701.67
		1	.	100	.	176	80807.7
		1	.	100	.	177	18817.3
		1	.	100	.	178	23328.2
		1	.	100	.	181	39073.5
		1	.	100	.	182	8721.67
		1	.	100	.	183	100885
		1	.	100	.	184	34151.8
		1	.	100	.	185	12880.3
		1	.	100	.	186	41376.3
		1	.	100	.	189	12185.5
		1	.	100	.	190	35724.7
		1	.	100	.	191	8902.67
		1	.	100	.	192	11263.5
		1	.	100	.	193	3715.5
		1	.	100	.	194	20386.8
		1	.	100	.	195	2609.83
		1	.	100	.	196	69975.8
		1	.	100	.	197	17527
		1	.	100	.	198	96566.5
		1	.	100	.	200	19468.8
		1	.	100	.	201	86977.3
		1	.	100	.	202	32307.5
		1	.	100	.	204	44541.2
		1	.	100	.	205	33597.2
		1	.	100	.	206	40572.3
		1	.	100	.	207	70248.2
		1	.	100	.	208	6453.33
		1	.	100	.	209	7954.83
		1	.	100	.	211	8264
		1	.	100	.	213	13920.7
		1	.	100	.	214	82920.5
		1	.	100	.	215	79122.2
		1	.	100	.	216	10247.7
		1	.	100	.	217	6328.17
		1	.	100	.	219	97216.2
		1	.	100	.	220	27492.7
		1	.	101	.	169	35741.2
		1	.	101	.	170	51849
		1	.	101	.	172	33779.7
		1	.	101	.	174	11697.2
		1	.	101	.	175	3701.67
		1	.	101	.	176	80807.7
		1	.	101	.	181	39073.5
		1	.	101	.	182	8721.67
		1	.	101	.	183	100885
		1	.	101	.	184	34151.8
		1	.	101	.	185	12880.3
		1	.	101	.	186	41376.3
		1	.	101	.	187	8707
		1	.	101	.	188	10914.5
		1	.	101	.	189	12185.5
		1	.	101	.	190	35724.7
		1	.	101	.	191	8902.67
		1	.	101	.	192	11263.5
		1	.	101	.	193	3715.5
		1	.	101	.	194	20386.8
		1	.	101	.	195	2609.83
		1	.	101	.	196	69975.8
		1	.	101	.	197	17527
		1	.	101	.	198	96566.5
		1	.	101	.	199	61462
		1	.	101	.	200	19468.8
		1	.	101	.	201	86977.3
		1	.	101	.	202	32307.5
		1	.	101	.	203	33482.5
		1	.	101	.	204	44541.2
		1	.	101	.	205	33597.2
		1	.	101	.	206	40572.3
		1	.	101	.	207	70248.2
		1	.	101	.	208	6453.33
		1	.	101	.	209	7954.83
		1	.	101	.	210	39695.3
		1	.	101	.	211	8264
		1	.	101	.	212	48340.7
		1	.	101	.	213	13920.7
		1	.	101	.	214	82920.5
		1	.	101	.	216	10247.7
		1	.	101	.	217	6328.17
		1	.	101	.	219	97216.2
		1	.	101	.	220	27492.7
		1	.	101	.	221	7719.17
		1	.	101	.	222	66090
		1	.	101	.	223	13443.5
		1	.	101	.	224	90281.5
		1	.	101	.	225	13088.3
		1	.	101	.	227	81853.2
		1	.	101	.	230	21509.3
		1	.	101	.	231	85212
		1	.	101	.	233	17973
		1	.	101	.	234	21105
		1	.	101	.	235	36606.8
		1	.	102	.	169	35741.2
		1	.	102	.	170	51849
		1	.	102	.	172	33779.7
		1	.	102	.	174	11697.2
		1	.	102	.	175	3701.67
		1	.	102	.	176	80807.7
		1	.	102	.	181	39073.5
		1	.	102	.	182	8721.67
		1	.	102	.	183	100885
		1	.	102	.	184	34151.8
		1	.	102	.	185	12880.3
		1	.	102	.	186	41376.3
		1	.	102	.	187	8707
		1	.	102	.	188	10914.5
		1	.	102	.	189	12185.5
		1	.	102	.	190	35724.7
		1	.	102	.	191	8902.67
		1	.	102	.	192	11263.5
		1	.	102	.	193	3715.5
		1	.	102	.	194	20386.8
		1	.	102	.	195	2609.83
		1	.	102	.	196	69975.8
		1	.	102	.	197	17527
		1	.	102	.	198	96566.5
		1	.	102	.	199	61462
		1	.	102	.	200	19468.8
		1	.	102	.	201	86977.3
		1	.	102	.	202	32307.5
		1	.	102	.	203	33482.5
		1	.	102	.	204	44541.2
		1	.	102	.	205	33597.2
		1	.	102	.	206	40572.3
		1	.	102	.	207	70248.2
		1	.	102	.	208	6453.33
		1	.	102	.	209	7954.83
		1	.	102	.	211	8264
		1	.	102	.	212	48340.7
		1	.	102	.	213	13920.7
		1	.	102	.	214	82920.5
		1	.	102	.	215	79122.2
		1	.	102	.	216	10247.7
		1	.	102	.	217	6328.17
		1	.	102	.	219	97216.2
		1	.	102	.	220	27492.7
		1	.	102	.	221	7719.17
		1	.	102	.	222	66090
		1	.	102	.	223	13443.5
		1	.	102	.	224	90281.5
		1	.	102	.	225	13088.3
		1	.	102	.	227	81853.2
		1	.	102	.	229	130597
		1	.	102	.	230	21509.3
		1	.	102	.	231	85212
		1	.	102	.	233	17973
		1	.	102	.	234	21105
		1	.	102	.	235	36606.8
		1	.	102	.	237	230824
		1	.	102	.	238	92320.7
		1	.	103	.	173	41394
		1	.	103	.	177	18817.3
		1	.	103	.	178	23328.2
		1	.	103	.	181	39073.5
		1	.	103	.	183	100885
		1	.	103	.	184	34151.8
		1	.	103	.	185	12880.3
		1	.	103	.	189	12185.5
		1	.	103	.	190	35724.7
		1	.	103	.	191	8902.67
		1	.	103	.	192	11263.5
		1	.	103	.	198	96566.5
		1	.	103	.	201	86977.3
		1	.	103	.	202	32307.5
		1	.	103	.	204	44541.2
		1	.	103	.	205	33597.2
		1	.	103	.	206	40572.3
		1	.	103	.	207	70248.2
		1	.	103	.	208	6453.33
		1	.	103	.	209	7954.83
		1	.	103	.	211	8264
		1	.	103	.	213	13920.7
		1	.	103	.	214	82920.5
		1	.	103	.	215	79122.2
		1	.	103	.	216	10247.7
		1	.	103	.	218	56189.3
		1	.	103	.	219	97216.2
		1	.	103	.	220	27492.7
		1	.	103	.	221	7719.17
		1	.	103	.	222	66090
		1	.	103	.	224	90281.5
		1	.	103	.	226	31027.2
		1	.	103	.	227	81853.2
		1	.	103	.	228	11990.8
		1	.	103	.	229	130597
		1	.	103	.	231	85212
		1	.	103	.	236	119081
		1	.	103	.	237	230824
		1	.	103	.	239	49699.2
		1	.	103	.	247	52041.2
		1	.	104	.	177	18817.3
		1	.	104	.	178	23328.2
		1	.	104	.	181	39073.5
		1	.	104	.	183	100885
		1	.	104	.	184	34151.8
		1	.	104	.	185	12880.3
		1	.	104	.	189	12185.5
		1	.	104	.	190	35724.7
		1	.	104	.	191	8902.67
		1	.	104	.	192	11263.5
		1	.	104	.	198	96566.5
		1	.	104	.	201	86977.3
		1	.	104	.	202	32307.5
		1	.	104	.	204	44541.2
		1	.	104	.	205	33597.2
		1	.	104	.	206	40572.3
		1	.	104	.	207	70248.2
		1	.	104	.	208	6453.33
		1	.	104	.	209	7954.83
		1	.	104	.	211	8264
		1	.	104	.	213	13920.7
		1	.	104	.	214	82920.5
		1	.	104	.	215	79122.2
		1	.	104	.	216	10247.7
		1	.	104	.	218	56189.3
		1	.	104	.	219	97216.2
		1	.	104	.	220	27492.7
		1	.	104	.	221	7719.17
		1	.	104	.	222	66090
		1	.	104	.	224	90281.5
		1	.	104	.	226	31027.2
		1	.	104	.	227	81853.2
		1	.	104	.	228	11990.8
		1	.	104	.	229	130597
		1	.	104	.	231	85212
		1	.	104	.	232	28924
		1	.	104	.	233	17973
		1	.	104	.	236	119081
		1	.	104	.	237	230824
		1	.	104	.	239	49699.2
		1	.	104	.	247	52041.2
		1	.	104	.	255	70744.2
		1	.	105	.	178	23328.2
		1	.	105	.	181	39073.5
		1	.	105	.	183	100885
		1	.	105	.	184	34151.8
		1	.	105	.	185	12880.3
		1	.	105	.	189	12185.5
		1	.	105	.	190	35724.7
		1	.	105	.	191	8902.67
		1	.	105	.	192	11263.5
		1	.	105	.	195	2609.83
		1	.	105	.	198	96566.5
		1	.	105	.	201	86977.3
		1	.	105	.	202	32307.5
		1	.	105	.	204	44541.2
		1	.	105	.	205	33597.2
		1	.	105	.	206	40572.3
		1	.	105	.	207	70248.2
		1	.	105	.	208	6453.33
		1	.	105	.	209	7954.83
		1	.	105	.	211	8264
		1	.	105	.	213	13920.7
		1	.	105	.	214	82920.5
		1	.	105	.	215	79122.2
		1	.	105	.	216	10247.7
		1	.	105	.	217	6328.17
		1	.	105	.	218	56189.3
		1	.	105	.	219	97216.2
		1	.	105	.	220	27492.7
		1	.	105	.	221	7719.17
		1	.	105	.	222	66090
		1	.	105	.	223	13443.5
		1	.	105	.	224	90281.5
		1	.	105	.	226	31027.2
		1	.	105	.	227	81853.2
		1	.	105	.	228	11990.8
		1	.	105	.	229	130597
		1	.	105	.	230	21509.3
		1	.	105	.	231	85212
		1	.	105	.	233	17973
		1	.	105	.	235	36606.8
		1	.	105	.	236	119081
		1	.	105	.	237	230824
		1	.	105	.	238	92320.7
		1	.	105	.	239	49699.2
		1	.	105	.	247	52041.2
		1	.	105	.	249	98745.2
		1	.	105	.	255	70744.2
		1	.	106	.	178	23328.2
		1	.	106	.	181	39073.5
		1	.	106	.	183	100885
		1	.	106	.	184	34151.8
		1	.	106	.	185	12880.3
		1	.	106	.	189	12185.5
		1	.	106	.	190	35724.7
		1	.	106	.	191	8902.67
		1	.	106	.	192	11263.5
		1	.	106	.	193	3715.5
		1	.	106	.	195	2609.83
		1	.	106	.	197	17527
		1	.	106	.	198	96566.5
		1	.	106	.	201	86977.3
		1	.	106	.	202	32307.5
		1	.	106	.	204	44541.2
		1	.	106	.	205	33597.2
		1	.	106	.	206	40572.3
		1	.	106	.	207	70248.2
		1	.	106	.	208	6453.33
		1	.	106	.	209	7954.83
		1	.	106	.	211	8264
		1	.	106	.	213	13920.7
		1	.	106	.	214	82920.5
		1	.	106	.	215	79122.2
		1	.	106	.	216	10247.7
		1	.	106	.	217	6328.17
		1	.	106	.	218	56189.3
		1	.	106	.	219	97216.2
		1	.	106	.	220	27492.7
		1	.	106	.	221	7719.17
		1	.	106	.	222	66090
		1	.	106	.	223	13443.5
		1	.	106	.	224	90281.5
		1	.	106	.	225	13088.3
		1	.	106	.	226	31027.2
		1	.	106	.	227	81853.2
		1	.	106	.	228	11990.8
		1	.	106	.	229	130597
		1	.	106	.	230	21509.3
		1	.	106	.	231	85212
		1	.	106	.	233	17973
		1	.	106	.	234	21105
		1	.	106	.	235	36606.8
		1	.	106	.	236	119081
		1	.	106	.	237	230824
		1	.	106	.	238	92320.7
		1	.	106	.	239	49699.2
		1	.	106	.	245	30842.8
		1	.	106	.	247	52041.2
		1	.	106	.	249	98745.2
		1	.	106	.	252	17906
		1	.	106	.	255	70744.2
		1	.	106	.	260	70918.5
		1	.	107	.	181	39073.5
		1	.	107	.	183	100885
		1	.	107	.	184	34151.8
		1	.	107	.	185	12880.3
		1	.	107	.	189	12185.5
		1	.	107	.	190	35724.7
		1	.	107	.	191	8902.67
		1	.	107	.	192	11263.5
		1	.	107	.	198	96566.5
		1	.	107	.	201	86977.3
		1	.	107	.	202	32307.5
		1	.	107	.	204	44541.2
		1	.	107	.	205	33597.2
		1	.	107	.	206	40572.3
		1	.	107	.	207	70248.2
		1	.	107	.	208	6453.33
		1	.	107	.	209	7954.83
		1	.	107	.	211	8264
		1	.	107	.	213	13920.7
		1	.	107	.	214	82920.5
		1	.	107	.	215	79122.2
		1	.	107	.	216	10247.7
		1	.	107	.	217	6328.17
		1	.	107	.	218	56189.3
		1	.	107	.	219	97216.2
		1	.	107	.	220	27492.7
		1	.	107	.	221	7719.17
		1	.	107	.	222	66090
		1	.	107	.	223	13443.5
		1	.	107	.	224	90281.5
		1	.	107	.	226	31027.2
		1	.	107	.	227	81853.2
		1	.	107	.	228	11990.8
		1	.	107	.	229	130597
		1	.	107	.	230	21509.3
		1	.	107	.	231	85212
		1	.	107	.	233	17973
		1	.	107	.	236	119081
		1	.	107	.	237	230824
		1	.	107	.	238	92320.7
		1	.	107	.	239	49699.2
		1	.	107	.	247	52041.2
		1	.	107	.	249	98745.2
		1	.	107	.	255	70744.2
		1	.	107	.	257	158667
		1	.	107	.	260	70918.5
		1	.	108	.	185	12880.3
		1	.	108	.	190	35724.7
		1	.	108	.	191	8902.67
		1	.	108	.	192	11263.5
		1	.	108	.	198	96566.5
		1	.	108	.	201	86977.3
		1	.	108	.	204	44541.2
		1	.	108	.	205	33597.2
		1	.	108	.	206	40572.3
		1	.	108	.	207	70248.2
		1	.	108	.	209	7954.83
		1	.	108	.	211	8264
		1	.	108	.	213	13920.7
		1	.	108	.	214	82920.5
		1	.	108	.	215	79122.2
		1	.	108	.	218	56189.3
		1	.	108	.	219	97216.2
		1	.	108	.	220	27492.7
		1	.	108	.	222	66090
		1	.	108	.	224	90281.5
		1	.	108	.	226	31027.2
		1	.	108	.	227	81853.2
		1	.	108	.	228	11990.8
		1	.	108	.	229	130597
		1	.	108	.	231	85212
		1	.	108	.	232	28924
		1	.	108	.	236	119081
		1	.	108	.	237	230824
		1	.	108	.	239	49699.2
		1	.	108	.	247	52041.2
		1	.	108	.	249	98745.2
		1	.	108	.	255	70744.2
		1	.	108	.	257	158667
		1	.	108	.	265	36901.5
		1	.	109	.	185	12880.3
		1	.	109	.	189	12185.5
		1	.	109	.	190	35724.7
		1	.	109	.	191	8902.67
		1	.	109	.	192	11263.5
		1	.	109	.	198	96566.5
		1	.	109	.	201	86977.3
		1	.	109	.	202	32307.5
		1	.	109	.	204	44541.2
		1	.	109	.	205	33597.2
		1	.	109	.	206	40572.3
		1	.	109	.	207	70248.2
		1	.	109	.	208	6453.33
[truncated: 6,826 more rows]

## Sheet: CPROD
CPROD(P,C) PRODUCT PRICE FOR EACH CONSUMPTION REGION
P	PRODUC T
C	CONSUMPTION REGION
Table S8: Unitary Product Price ($US/Mg) or ($US/MWh)
Columna1	Columna2	CONSUMER 1	CONSUMER 2	CONSUMER 3	CONSUMER 4	CONSUMER 5	CONSUMER 6	CONSUMER 7	CONSUMER 8	CONSUMER 9	CONSUMER 10	CONSUMER 11	CONSUMER 12	CONSUMER 13	CONSUMER 14	CONSUMER 15	CONSUMER 16	CONSUMER 17	CONSUMER 18	CONSUMER 19	CONSUMER 20	CONSUMER 21	CONSUMER 22	CONSUMER 23	CONSUMER 24	CONSUMER 25	CONSUMER 26	CONSUMER 27	CONSUMER 28	CONSUMER 29	CONSUMER 30	CONSUMER 31	CONSUMER 32	CONSUMER 33	CONSUMER 34	CONSUMER 35	CONSUMER 36	CONSUMER 37	CONSUMER 38	CONSUMER 39	CONSUMER 40	CONSUMER 41	CONSUMER 42	CONSUMER 43	CONSUMER 44	CONSUMER 45	CONSUMER 46	CONSUMER 47	CONSUMER 48
		1	2	3	4	5	6	7	8	9	10	11	12	13	14	15	16	17	18	19	20	21	22	23	24	25	26	27	28	29	30	31	32	33	34	35	36	37	38	39	40	41	42	43	44	45	46	47	48
AMMONIA	1	571.76	571.76	571.76	571.76	571.76	571.76	571.76	571.76	571.76	571.76	571.76	571.76	571.76	571.76	571.76	571.76	571.76	571.76	571.76	571.76	571.76	571.76	571.76	571.76	571.76	571.76	571.76	571.76	571.76	571.76	571.76	571.76	571.76	571.76	571.76	571.76	571.76	571.76	571.76	571.76	571.76	571.76	571.76	571.76	571.76	571.76	571.76	571.76
FORMALDEHYDE	2	462.97	462.97	462.97	462.97	462.97	462.97	462.97	462.97	462.97	462.97	462.97	462.97	462.97	462.97	462.97	462.97	462.97	462.97	462.97	462.97	462.97	462.97	462.97	462.97	462.97	462.97	462.97	462.97	462.97	462.97	462.97	462.97	462.97	462.97	462.97	462.97	462.97	462.97	462.97	462.97	462.97	462.97	462.97	462.97	462.97	462.97	462.97	462.97
MIX FISHER TROPSCH 1	3	753.036	753.036	753.036	753.036	753.036	753.036	753.036	753.036	753.036	753.036	753.036	753.036	753.036	753.036	753.036	753.036	753.036	753.036	753.036	753.036	753.036	753.036	753.036	753.036	753.036	753.036	753.036	753.036	753.036	753.036	753.036	753.036	753.036	753.036	753.036	753.036	753.036	753.036	753.036	753.036	753.036	753.036	753.036	753.036	753.036	753.036	753.036	753.036
MIX FISHER TROPSCH 2	4	758.912	758.912	758.912	758.912	758.912	758.912	758.912	758.912	758.912	758.912	758.912	758.912	758.912	758.912	758.912	758.912	758.912	758.912	758.912	758.912	758.912	758.912	758.912	758.912	758.912	758.912	758.912	758.912	758.912	758.912	758.912	758.912	758.912	758.912	758.912	758.912	758.912	758.912	758.912	758.912	758.912	758.912	758.912	758.912	758.912	758.912	758.912	758.912
ENERGY /MWh	5	56.9	56.9	56.9	56.9	56.9	56.9	56.9	56.9	56.9	56.9	56.9	56.9	56.9	56.9	56.9	56.9	56.9	56.9	56.9	56.9	56.9	56.9	56.9	56.9	56.9	56.9	56.9	56.9	56.9	56.9	56.9	56.9	56.9	56.9	56.9	56.9	56.9	56.9	56.9	56.9	56.9	56.9	56.9	56.9	56.9	56.9	56.9	56.9
MIX FISHER TROPSCH 4	6	514.13	514.13	514.13	514.13	514.13	514.13	514.13	514.13	514.13	514.13	514.13	514.13	514.13	514.13	514.13	514.13	514.13	514.13	514.13	514.13	514.13	514.13	514.13	514.13	514.13	514.13	514.13	514.13	514.13	514.13	514.13	514.13	514.13	514.13	514.13	514.13	514.13	514.13	514.13	514.13	514.13	514.13	514.13	514.13	514.13	514.13	514.13	514.13
UREA	7	335	335	335	335	335	335	335	335	335	335	335	335	335	335	335	335	335	335	335	335	335	335	335	335	335	335	335	335	335	335	335	335	335	335	335	335	335	335	335	335	335	335	335	335	335	335	335	335
METANOL	8	313	313	313	313	313	313	313	313	313	313	313	313	313	313	313	313	313	313	313	313	313	313	313	313	313	313	313	313	313	313	313	313	313	313	313	313	313	313	313	313	313	313	313	313	313	313	313	313
		https://www.icis.com/chemicals/channel-info-chemicals-a-z/						551.93
Relación Nafta	903	https://markets.businessinsider.com/commodities/naphthapreis	2018									https://www.eia.gov/dnav/pet/pet_move_railna_dc_R10-R20_mbbl_m.htm
Relación Queroseno	668.557	https://www.eia.gov/dnav/pet/hist/LeafHandler.ashx?n=PET&s=EMA_EPPK_PWG_NUS_DPG&f=M	April 2018
Relación Diesel	976.165	Gas to liquids: Launch pads proffered for small-scale GTL plants. Ajay Makan, April 15, 2013. Financial Times	2013									http://markets.businessinsider.com/commodities/ethanol-price
Relación Gasóleo	622	https://es.investing.com/commodities/london-gas-oil	April 2018
Relación Cera	612.5	Equal to Nafta
			55.1412
Relación Nafta	15.4939	25.2695	21.7237	61.1037		12.9604	12.003	10.8899	17.937
Relación Queroseno	24.8155	53.4979	45.1346	79.8327		20.7576	25.4114	22.6255	23.4349
Relación Diesel	29.5129	55.144	48.2835	83.8494		24.687	26.1933	24.204	24.614			703.408
Relación Gasóleo	18.5238	45.2675	37.7871	50.2092		15.4948	21.502	18.9423	14.7389
Relación Cera	31.2025	31.3481	46.5566	65.662		26.1003	14.8903	23.3383	19.2751
total	119.549	210.527	199.486	340.657
[truncated: 28 more columns]

## Sheet: CMAT
CMAT(B,S) AGRICULTURAL RESIDUE COST FOR EACH SUPPLIER
B	BIOMASS TYPE
S	HARVESTING SITES
Table S9: Unitary Raw Material Price ($US/Mg)
		location 1	location 2	location 3	location 4	location 5	location 6	location 7	location 8	location 9	location 10	location 11	location 12	location 13	location 14	location 15	location 16	location 17	location 18	location 19	location 20	location 21	location 22	location 23	location 24	location 25	location 26	location 27	location 28	location 29	location 30	location 31	location 32	location 33	location 34	location 35	location 36	location 37	location 38	location 39	location 40	location 41	location 42	location 43	location 44	location 45	location 46	location 47	location 48
Columna1	Columna2	1	2	3	4	5	6	7	8	9	10	11	12	13	14	15	16	17	18	19	20	21	22	23	24	25	26	27	28	29	30	31	32	33	34	35	36	37	38	39	40	41	42	43	44	45	46	47	48
Corn Stover	1	18.3333	18.3333	18.3333	18.3333	18.3333	18.3333	18.3333	18.3333	18.3333	18.3333	18.3333	18.3333	18.3333	18.3333	18.3333	18.3333	18.3333	18.3333	18.3333	18.3333	18.3333	18.3333	18.3333	18.3333	18.3333	18.3333	18.3333	18.3333	18.3333	18.3333	18.3333	18.3333	18.3333	18.3333	18.3333	18.3333	18.3333	18.3333	18.3333	18.3333	18.3333	18.3333	18.3333	18.3333	18.3333	18.3333	18.3333	18.3333
Rice Straw	2	27.7778	27.7778	27.7778	27.7778	27.7778	27.7778	27.7778	27.7778	27.7778	27.7778	27.7778	27.7778	27.7778	27.7778	27.7778	27.7778	27.7778	27.7778	27.7778	27.7778	27.7778	27.7778	27.7778	27.7778	27.7778	27.7778	27.7778	27.7778	27.7778	27.7778	27.7778	27.7778	27.7778	27.7778	27.7778	27.7778	27.7778	27.7778	27.7778	27.7778	27.7778	27.7778	27.7778	27.7778	27.7778	27.7778	27.7778	27.7778
Agave residue	3	23.3333	23.3333	23.3333	23.3333	23.3333	23.3333	23.3333	23.3333	23.3333	23.3333	23.3333	23.3333	23.3333	23.3333	23.3333	23.3333	23.3333	23.3333	23.3333	23.3333	23.3333	23.3333	23.3333	23.3333	23.3333	23.3333	23.3333	23.3333	23.3333	23.3333	23.3333	23.3333	23.3333	23.3333	23.3333	23.3333	23.3333	23.3333	23.3333	23.3333	23.3333	23.3333	23.3333	23.3333	23.3333	23.3333	23.3333	23.3333
Sorghum straw	4	14.9673	14.9673	14.9673	14.9673	14.9673	14.9673	14.9673	14.9673	14.9673	14.9673	14.9673	14.9673	14.9673	14.9673	14.9673	14.9673	14.9673	14.9673	14.9673	14.9673	14.9673	14.9673	14.9673	14.9673	14.9673	14.9673	14.9673	14.9673	14.9673	14.9673	14.9673	14.9673	14.9673	14.9673	14.9673	14.9673	14.9673	14.9673	14.9673	14.9673	14.9673	14.9673	14.9673	14.9673	14.9673	14.9673	14.9673	14.9673
Sugar cane bagasse	5	2.77778	2.77778	2.77778	2.77778	2.77778	2.77778	2.77778	2.77778	2.77778	2.77778	2.77778	2.77778	2.77778	2.77778	2.77778	2.77778	2.77778	2.77778	2.77778	2.77778	2.77778	2.77778	2.77778	2.77778	2.77778	2.77778	2.77778	2.77778	2.77778	2.77778	2.77778	2.77778	2.77778	2.77778	2.77778	2.77778	2.77778	2.77778	2.77778	2.77778	2.77778	2.77778	2.77778	2.77778	2.77778	2.77778	2.77778	2.77778
Wheat Straw	6	16.6667	16.6667	16.6667	16.6667	16.6667	16.6667	16.6667	16.6667	16.6667	16.6667	16.6667	16.6667	16.6667	16.6667	16.6667	16.6667	16.6667	16.6667	16.6667	16.6667	16.6667	16.6667	16.6667	16.6667	16.6667	16.6667	16.6667	16.6667	16.6667	16.6667	16.6667	16.6667	16.6667	16.6667	16.6667	16.6667	16.6667	16.6667	16.6667	16.6667	16.6667	16.6667	16.6667	16.6667	16.6667	16.6667	16.6667	16.6667
Barley Straw	7	22.2222	22.2222	22.2222	22.2222	22.2222	22.2222	22.2222	22.2222	22.2222	22.2222	22.2222	22.2222	22.2222	22.2222	22.2222	22.2222	22.2222	22.2222	22.2222	22.2222	22.2222	22.2222	22.2222	22.2222	22.2222	22.2222	22.2222	22.2222	22.2222	22.2222	22.2222	22.2222	22.2222	22.2222	22.2222	22.2222	22.2222	22.2222	22.2222	22.2222	22.2222	22.2222	22.2222	22.2222	22.2222	22.2222	22.2222	22.2222
Pecan nuit shell	8	222.222	222.222	222.222	222.222	222.222	222.222	222.222	222.222	222.222	222.222	222.222	222.222	222.222	222.222	222.222	222.222	222.222	222.222	222.222	222.222	222.222	222.222	222.222	222.222	222.222	222.222	222.222	222.222	222.222	222.222	222.222	222.222	222.222	222.222	222.222	222.222	222.222	222.222	222.222	222.222	222.222	222.222	222.222	222.222	222.222	222.222	222.222	222.222
		Agave	2408884	10137225	233.793	23.3793
		Palay rice	232159	921449	220.502	22.0502
		Sugarcane	56672829	26225927	25.7089	2.57089
		Barley	845707	2950771	193.84	19.384
		Corn (yellow & white)	23133599	72077147	173.094	17.3094
		Pecan nut	122536	6106022	2768.36	276.836
		Sorghum	8394057	19986210	132.278	13.2278
		Wheat (several types)	3971536	12644957	176.883	17.6883
[truncated: 865 more columns]

## Sheet: P_DEMAND
P_DEMAND(P,C) PRODUCT DEMAND FOR CONSUMPTION REGIONS
P	PRODUCT
C	CONSUMPTION REGIONS
Table S10: Product Demand for consumption regions (Mg/y) or (MWh/y)
		CONSUMER 1	CONSUMER 2	CONSUMER 3	CONSUMER 4	CONSUMER 5	CONSUMER 6	CONSUMER 7	CONSUMER 8	CONSUMER 9	CONSUMER 10	CONSUMER 11	CONSUMER 12	CONSUMER 13	CONSUMER 14	CONSUMER 15	CONSUMER 16	CONSUMER 17	CONSUMER 18	CONSUMER 19	CONSUMER 20	CONSUMER 21	CONSUMER 22	CONSUMER 23	CONSUMER 24	CONSUMER 25	CONSUMER 26	CONSUMER 27	CONSUMER 28	CONSUMER 29	CONSUMER 30	CONSUMER 31	CONSUMER 32	CONSUMER 33	CONSUMER 34	CONSUMER 35	CONSUMER 36	CONSUMER 37	CONSUMER 38	CONSUMER 39	CONSUMER 40	CONSUMER 41	CONSUMER 42	CONSUMER 43	CONSUMER 44	CONSUMER 45	CONSUMER 46	CONSUMER 47	CONSUMER 48
Columna1	Columna2	1	2	3	4	5	6	7	8	9	10	11	12	13	14	15	16	17	18	19	20	21	22	23	24	25	26	27	28	29	30	31	32	33	34	35	36	37	38	39	40	41	42	43	44	45	46	47	48
AMMONIA	1	2.29676e+06	2.29676e+06	2.29676e+06	2.29676e+06	2.29676e+06	2.29676e+06	2.29676e+06	2.29676e+06	2.29676e+06	2.29676e+06	2.29676e+06	2.29676e+06	2.29676e+06	2.29676e+06	2.29676e+06	2.29676e+06	2.29676e+06	2.29676e+06	2.29676e+06	2.29676e+06	2.29676e+06	2.29676e+06	2.29676e+06	2.29676e+06	2.29676e+06	2.29676e+06	2.29676e+06	2.29676e+06	2.29676e+06	2.29676e+06	2.29676e+06	2.29676e+06	2.29676e+06	2.29676e+06	2.29676e+06	2.29676e+06	2.29676e+06	2.29676e+06	2.29676e+06	2.29676e+06	2.29676e+06	2.29676e+06	2.29676e+06	2.29676e+06	2.29676e+06	2.29676e+06	2.29676e+06	2.29676e+06
ACETALDEHYDE	2	340500	340500	340500	340500	340500	340500	340500	340500	340500	340500	340500	340500	340500	340500	340500	340500	340500	340500	340500	340500	340500	340500	340500	340500	340500	340500	340500	340500	340500	340500	340500	340500	340500	340500	340500	340500	340500	340500	340500	340500	340500	340500	340500	340500	340500	340500	340500	340500
MIX FISHER TROPSCH 1	3	0	0	0	0	0	0	0	0	0	0	0	0	0	0	0	0	0	0	0	0	0	0	0	0	0	0	0	0	0	0	0	0	0	0	0	0	0	0	0	0	0	0	0	0	0	0	0	0
MIX FISHER TROPSCH 2	4	0	0	0	0	0	0	0	0	0	0	0	0	0	0	0	0	0	0	0	0	0	0	0	0	0	0	0	0	0	0	0	0	0	0	0	0	0	0	0	0	0	0	0	0	0	0	0	0
ELECTRICITY	5	220560	220560	220560	220560	220560	220560	220560	220560	220560	220560	220560	220560	220560	220560	220560	220560	220560	220560	220560	220560	220560	220560	220560	220560	220560	220560	220560	220560	220560	220560	220560	220560	220560	220560	220560	220560	220560	220560	220560	220560	220560	220560	220560	220560	220560	220560	220560	220560
MIX FISHER TROPSCH 4	6	7745000	7745000	7745000	7745000	7745000	7745000	7745000	7745000	7745000	7745000	7745000	7745000	7745000	7745000	7745000	7745000	7745000	7745000	7745000	7745000	7745000	7745000	7745000	7745000	7745000	7745000	7745000	7745000	7745000	7745000	7745000	7745000	7745000	7745000	7745000	7745000	7745000	7745000	7745000	7745000	7745000	7745000	7745000	7745000	7745000	7745000	7745000	7745000
UREA	7	5936000	5936000	5936000	5936000	5936000	5936000	5936000	5936000	5936000	5936000	5936000	5936000	5936000	5936000	5936000	5936000	5936000	5936000	5936000	5936000	5936000	5936000	5936000	5936000	5936000	5936000	5936000	5936000	5936000	5936000	5936000	5936000	5936000	5936000	5936000	5936000	5936000	5936000	5936000	5936000	5936000	5936000	5936000	5936000	5936000	5936000	5936000	5936000
METANOL	8	4566210	4566210	4566210	4566210	4566210	4566210	4566210	4566210	4566210	4566210	4566210	4566210	4566210	4566210	4566210	4566210	4566210	4566210	4566210	4566210	4566210	4566210	4566210	4566210	4566210	4566210	4566210	4566210	4566210	4566210	4566210	4566210	4566210	4566210	4566210	4566210	4566210	4566210	4566210	4566210	4566210	4566210	4566210	4566210	4566210	4566210	4566210	4566210
[truncated: 28 more columns]

## Sheet: COEF_SPINV
COEF_SPINV(P,R) SPECIFY INVESMENT FUNCTION'S COEFFICIENT
P	PRODUCT
R	PROCESSING ROUTES
Table S11: Specify invesment function coefficient ($US/Mg) or ($US/MWh)
		ROUTE1	ROUTE2	ROUTE3	ROUTE4	ROUTE5	ROUTE6	ROUTE7	ROUTE8	ROUTE9
Columna1	Columna2	1	2	3	4	5	6	7	8	9
AMMONIA	1	358.3	0	0	0	0	0	0	0	0
FORMALDEHYDE	2	0	250	0	0	0	0	0	0	0
MIX FISHER TROPSCH 1	3	0	0	714.7	0	0	0	0	0	0
MIX FISHER TROPSCH 2	4	0	0	0	714.7	0	0	0	0	0
ELECTRICITY	5	0	0	0	0	23.25	0	0	0	0
MIX FISHER TROPSCH 4	6	0	0	0	0	0	725.87	0	0	0
UREA	7	0	0	0	0	0	0	299.422	0	0
METANOL	8	0	0	0	0	0	0	0	214.252	0

## Sheet: DENUM_SPINV
DENUM_SPINV(P,R) SPECIFY INVESMENT FUNCTION'S DENUMBERED
P	PRODUCT
R	PROCESSING ROUTES
Table S12: Specify invesment function denumbered (Mg/y) or (MWh/y)
		ROUTE1	ROUTE2	ROUTE3	ROUTE4	ROUTE5	ROUTE6	ROUTE7	ROUTE8	ROUTE9
Columna1	Columna2	1	2	3	4	5	6	7	8	9
AMMONIA	1	459352	1	1	1	1	1	1	1	1
FORMALDEHYDE	2	1	68100	1	1	1	1	1	1	1
MIX FISHER TROPSCH 1	3	1	1	7045000	1	1	1	1	1	1
MIX FISHER TROPSCH 2	4	1	1	1	7045000	1	1	1	1	1
ELECTRICITY	5	1	1	1	1	44112	1	1	1	1
MIX FISHER TROPSCH 4	6	1	1	1	1	1	1549000	1	1	1
UREA	7	1	1	1	1	1	1	1187200	1	1
METANOL	8	1	1	1	1	1	1	1	913242	1

## Sheet: EXP_SPINV
EXP_SPINV(P,R) SPECIFY INVESMENT FUNCTION'S EXPONENT
P	PRODUCT
R	PROCESSING ROUTES
Table S13: Specify invesment function exponent
		ROUTE1	ROUTE2	ROUTE3	ROUTE4	ROUTE5	ROUTE6	ROUTE7	ROUTE8	ROUTE9
Columna1	Columna2	1	2	3	4	5	6	7	8	9
AMMONIA	1	-0.2153	1	1	1	1	1	1	1	1
ACETALDEHYDE	2	1	-0.13903	1	1	1	1	1	1	1
MIX FISHER TROPSCH 1	3	1	1	-0.10066	1	1	1	1	1	1
MIX FISHER TROPSCH 2	4	1	1	1	-0.10066	1	1	1	1	1
ELECTRICITY	5	1	1	1	1	-0.177	1	1	1	1
MIX FISHER TROPSCH 4	6	1	1	1	1	1	-0.10066	1	1	1
UREA	7	1	1	1	1	1	1	-0.0757	1	1
METANOL	8	1	1	1	1	1	1	1	-0.3063	1

[truncated: 7 more sheets: DSF, CSF, DFC, CFC, ALPHAF, CAPMIN, CAPMAX]
